# Supplementary material for: Multiple-unit interlocking enhances the single-stranded tiles assembly of DNA nanostructures
Source: Royal Society of Chemistry journal article supplement (doi:10.1039/d4nr03288h), 2024-01-01
Supplement: d4nr03288h1.pdf [file d4nr03288h1.pdf]

## Supplementary information

### **Multiple-unit interlocking enhance single stranded tiles assembly of DNA nanostructures**

*Xiangxiang Guan<sup>1,2</sup>, Chenyou Zhu<sup>1,2</sup>, Yuanchen Dong<sup>3,4\*</sup>, Dongsheng Liu<sup>1,2\*</sup>,  
Chengde Mao<sup>5\*</sup>*

- 1. Key Laboratory of Bioorganic Phosphorus Chemistry & Chemical Biology (Ministry of Education), Department of Chemistry, Tsinghua University, Beijing 100084, P. R. China*
- 2. Engineering Research Center of Advanced Rare Earth Materials, (Ministry of Education), Department of Chemistry, Tsinghua University, Beijing 100084, P. R. China*
- 3. CAS Key Laboratory of Colloid Interface and Chemical Thermodynamics, Beijing National Laboratory for Molecular Sciences, Institute of Chemistry, Chinese Academy of Sciences, Beijing 100190, P. R. China*
- 4. University of Chinese Academy of Sciences, Beijing 100049, P. R. China*
- 5. Department of Chemistry, Purdue University, West Lafayette, Indiana 47907, United States*

*Corresponding E-mail: [dongyc@iccas.ac.cn](mailto:dongyc@iccas.ac.cn), [liudongsheng@tsinghua.edu.cn](mailto:liudongsheng@tsinghua.edu.cn),*

*[mao@purdue.edu](mailto:mao@purdue.edu)*

## Materials and experimental methods

### 1. Materials

The DNA strands for the assembling DNA bricks were purchased from Beijing Xianghong Biotechnology Co., Ltd at 10 nmol synthesis scales with concentrations normalized to 500  $\mu$ M. Scaffold single-stranded Foundation ssDNA™ 7249(M13mp18) was purchased from Guild BioSciences. All single-stranded DNA with multiple-unit and all DNA staple strands were purchased from SupraDNA Technology (Beijing, China). GeneRuler Express DNA Ladder, agarose, 50 $\times$ TAE buffer and SYBR Gold were purchased from Thermo Fisher Scientific. All the other chemicals were from Sigma-Aldrich (St. Louis, MO, USA).

### 2. DNA assembly process

The MUD-square, MUA-rectangle, MUD-triangle, MUD-cross, MUD-xU ( $x=2\sim 24$ ) samples were assembled by mixing the multiple-unit DNA strands in an equimolar stoichiometric ratio with 5-fold staple DNA strands, which were generated in the 1 $\times$ TAE buffer (40 mM Tris, 20 mM glacial acetic acid, 1 mM EDTA, 20 mM magnesium acetate or magnesium acetate with concentration gradient). The final concentration of each MUD strand was adjusted to roughly 10 nM. The square-shaped DNA bricks and MUD-1U were assembled by mixing the entire DNA strands in an equimolar stoichiometric ratio, which were generated in the 0.5 $\times$ TE-MgCl<sub>2</sub> buffer (5 mM Tris, 1 mM EDTA, 20 mM MgCl<sub>2</sub> or MgCl<sub>2</sub> with concentration gradient). The final concentration of each strand was adjusted to roughly 100 nM. For modifying the assembly yields, a gradient of magnesium ion concentrations was utilized, ranging from 0 mM to 30 mM in increments of 2.5 mM. The conventional DNA origami with a square shape was assembled with a ultralong scaffold M13mp18 circular DNA and 5-fold staple strands. The final concentration of M13mp18 circular DNA was adjusted to roughly 10 nM. All the DNA assemblies above were annealed in a PCR thermal cycler.

The MUD-square, MUA-rectangle, MUD-triangle, MUD-cross, MUD-xU ( $x=2\sim 24$ ) were heated to 95 °C with staying 5 min, then cooled to 75 °C at a rate of 5 °C/1 min, continued to 25 °C at a rate of 1 °C/y min ( $y=2, 10, 30, 60$ ), and was finally held at 4

°C. The square-shaped DNA bricks and MUD-1U were heated to 90 °C with staying 5 min, then cooled to 65 °C at a rate of 1 °C/5 min, continued to 25 °C at a rate of 1 °C/y min (y=2, 10, 30, 60), and was finally held at 4 °C. The CDO-square was cooling from 85 °C to 25 °C at a rate of 1 °C/2 min, and was finally held at 4 °C. In DNA origami and MUD preparations, the use of longer scaffold strands incurs an entropic penalty, which consequently raises the melting temperature of the DNA assembly. This increase is attributed to an enthalpic effect. Therefore, the starting point of the precise cooling process of DNA bricks (65 °C) is lower than those of MUD structures (75 °C) and CDO-square structure (rapid uniform cooling rates starting from 85 °C).

### 3. Agarose gel electrophoresis

We run 2% agarose gels containing 1× TAE-Mg buffer (40 mM Tris, 20 mM glacial acetic acid, 1 mM EDTA, 12.5 mM magnesium acetate) or 0.5×TBE buffer (4.45 mM Tris, 4.45 mM boric acid, 1 mM EDTA). to characterize the DNA nanostructure samples. All of the samples were kept on ice throughout the experiment. Each sample, prepared at a concentration of 10 nM for the target structure and with a volume of 5  $\mu$ l, was mixed with a 6 × loading in a 1  $\mu$ l volume and then loaded into each lane. After sample loading, the gels were subjected to an electric field of 60 V across a distance of 18 cm for 1-2 h on ice bath. SYBR-Gold were premixed with the gel buffer during gel preparation and stained the samples during the electrophoresis process. We used the Gel doc XR+ with image lab software (Biorad) to capture and analyze the agarose gel images.

4.The calculation method for analyzing the intact assembly proportion though gel images

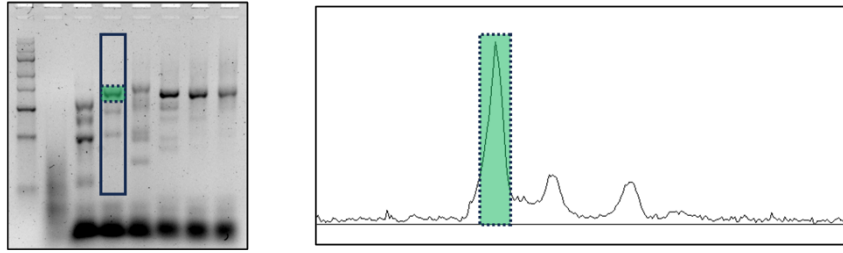

Capture clear images of the gel after electrophoresis. Use ImageJ software to subtract the background and then to generate an intensity curve corresponding to the selected area. Next, use a python code to calculate the intensity of the bands corresponding to the intact assembly marked by a green mask. For excluding the effect of excess short DNA strands, we calculated the intensity of the selected lane area within black-boxed region. Divide the of the intensity of intact assembly band by the intensity of total the black-boxed area to obtain the proportion of the intact assembly. Multiply the value by 100 to express the result as a percentage.

#### 5.AFM imaging

All samples were imaged using a Multimode VIII microscope (Bruker) in the ScanAsyst mode in fluid with ScanAsyst fluid tips. The AFM samples were prepared as follows, dropping 2.5  $\mu\text{l}$  (10 nM) sample solution onto the freshly cleaved mica, keeping 2-min for adsorption, adding  $1\times\text{TAE-Mg}^{2+}\text{-NiCl}_2$  buffer (40 mM Tris, 20 mM glacial acetic acid, 1 nM EDTA, 12.5 mM magnesium acetate, 8 mM  $\text{NiCl}_2$ ) onto mica for enhancing sample adsorption. After 5-min adsorption, samples were scanned with a peak force setpoint of 0.1 N, peak force frequency of 2 kHz. AFM images were analyzed by Gwyddion 2.63 software.

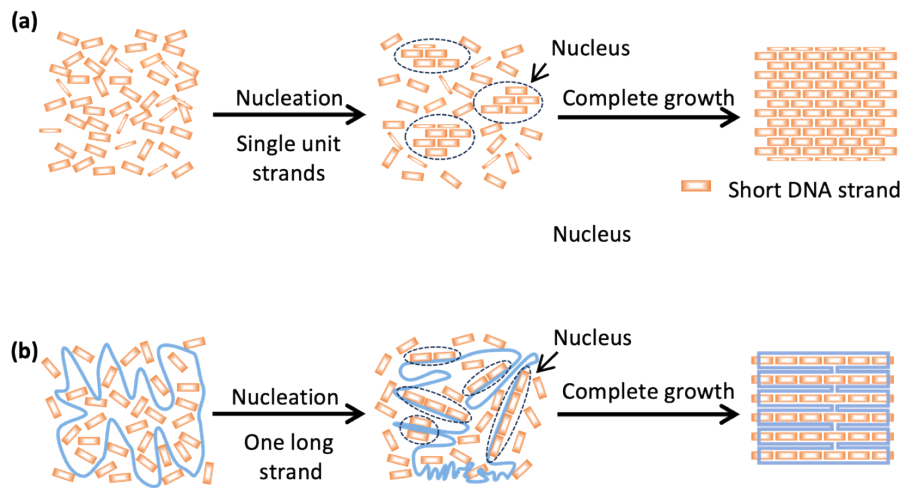

Fig. S1. Schematic illustrations of a) the DNA bricks assembly and b) the conventional DNA origami assembly, which has the same design as square shaped MUD in Scheme. 1b. In the conventional square shaped DNA origami, only one ultra-long ssDNA exists in the assembly system, all the nuclei are arranged in the long ssDNA.

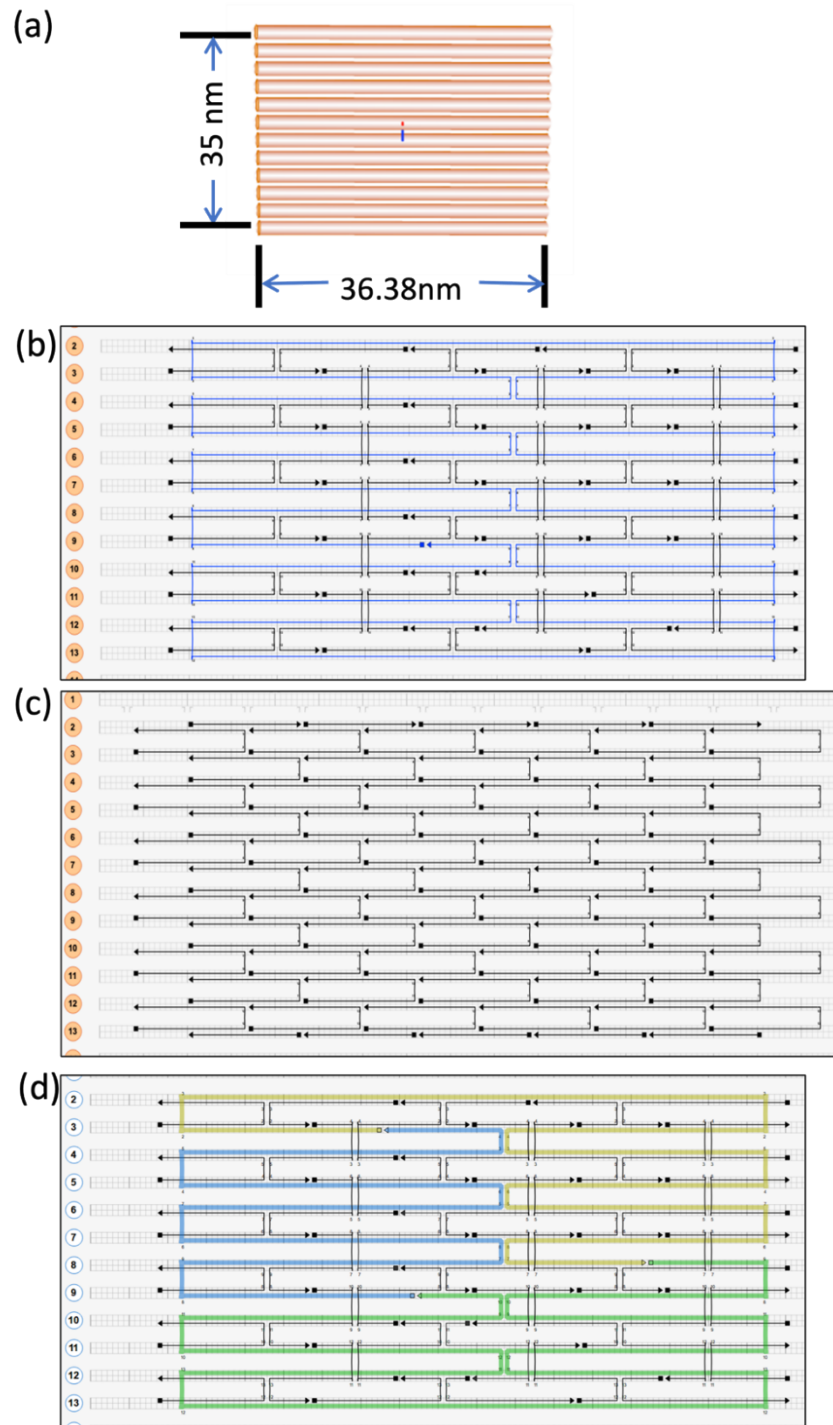

Fig. S2. a) the size details of square shaped DNA nanostructure. b-d) The arrangement of DNA strands within DNA nanostructure with square shaped designed in caDNAo. b) The conventional origami with a square shape. Only the first 1384 bases of M13mp18 were used as scaffold, which are marked by blue colors. c) DNA bricks with a square shape. All the ssDNA tiles are marked by black color. d) MUD-square. The scaffold of MUD-square is totally 1384 bases long, consisting of one 360 nt, one 410 nt and one 614 nt DNA strands which are marked by blue, olive and green colors. The staples are all marked by black color. The sequences are listed in Table S1-3.

V(assembly): V(0.5×TBE)=1: 1, incubate 3.5 h

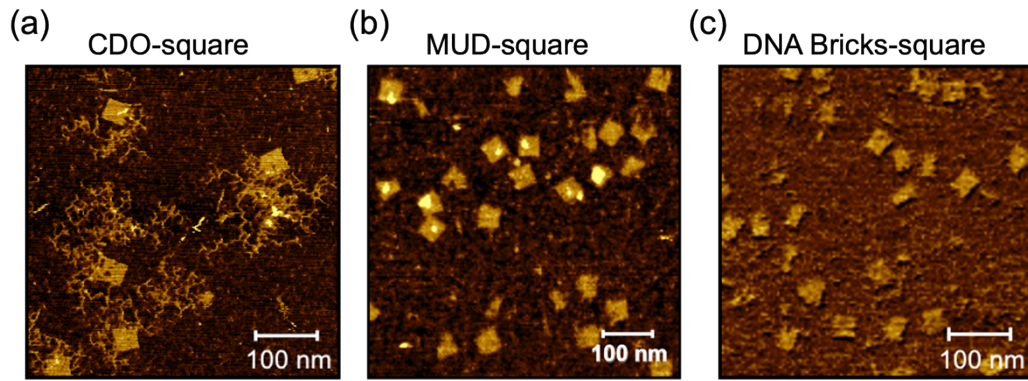

Fig. S3. The AFM results after incubating 0.5×TBE with a) CDO-square, b) MUD-square, c) DNA bricks-square for 3.5 h.

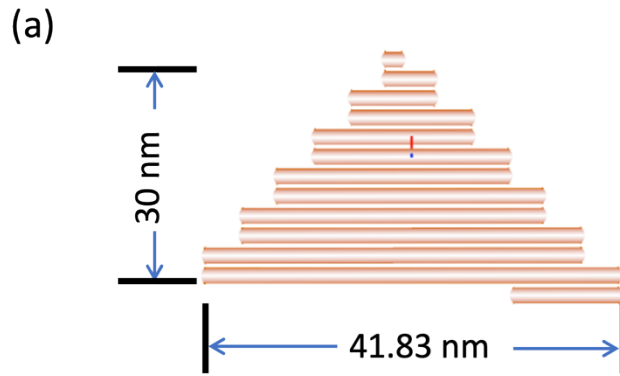

(b)

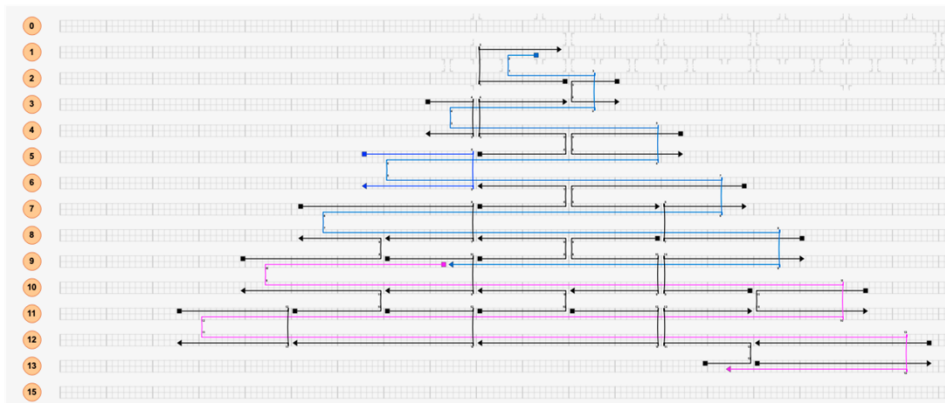

Fig. S4. a) The size details of triangle shaped DNA nanostructure. b) The arrangement of DNA strands within triangle shaped DNA nanostructure designed in caDNAno. The scaffold of MUD-triangle is totally 800 bases long, consisting of two 400 nt (8 units) DNA strands which are marked by blue and magenta colors. The staples are all marked by black color. The sequences are listed in Table S4.



(a)

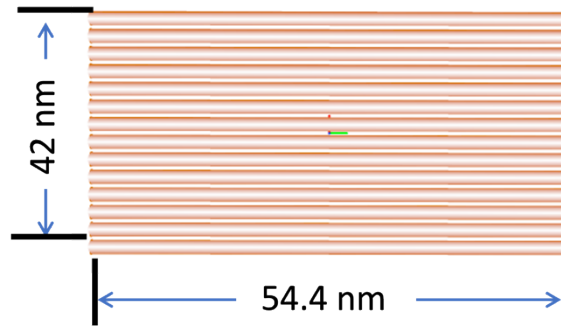

(b)

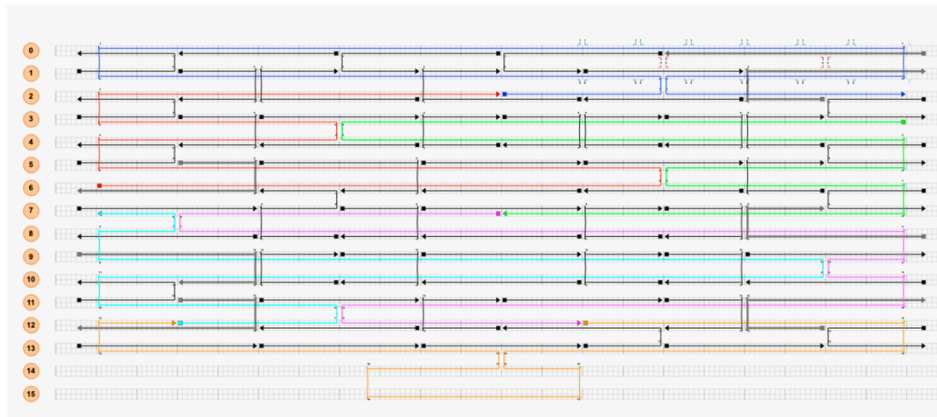

Fig. S5. a) The size details of rectangle shaped DNA nanostructure. b) The arrangement of DNA strands within rectangle shaped DNA nanostructure designed in caDNAno. The scaffold of MUD-rectangle is totally 2328 bases long, consisting of five 400 nt (8 units) and one 326 nt (6 units) DNA strands which are marked by blue, brown, green, cyan, orange and magenta colors. The staples are all marked by black color. The sequences are listed in Table S5.

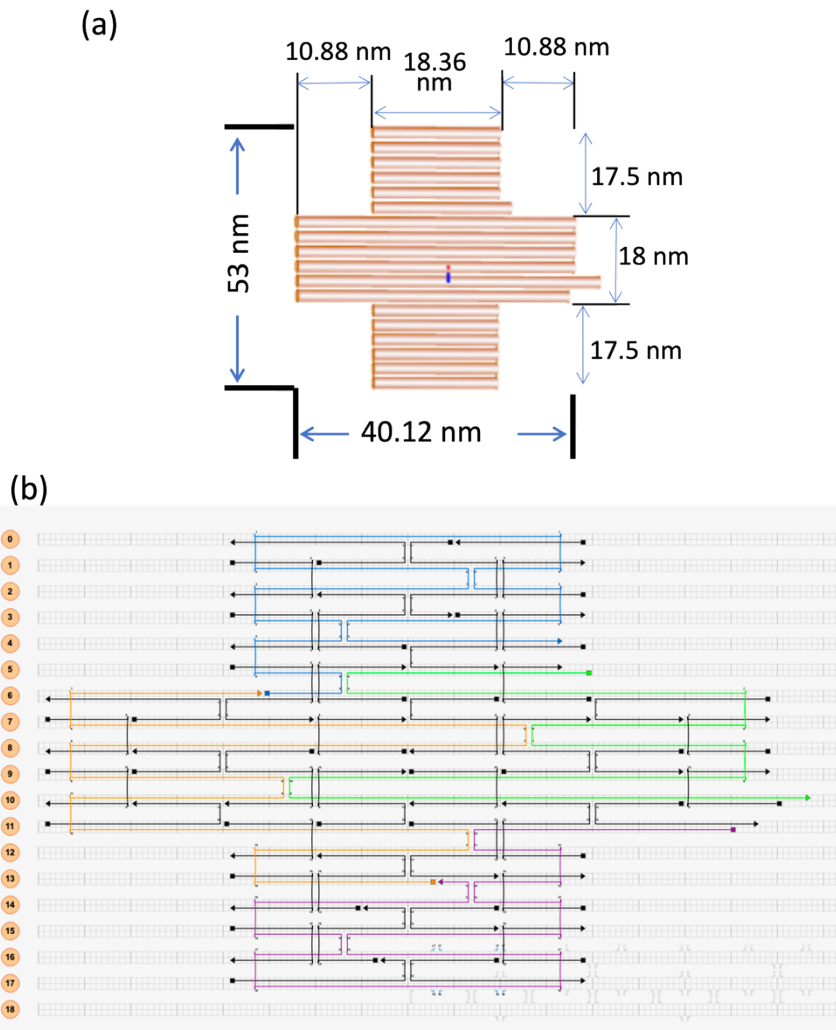

Fig.S6. a) The size details of cross shaped DNA nanostructure. b) The arrangement of DNA strands within cross shaped DNA nanostructure designed in caDNAno. The scaffold of MUD-cross is totally 1370 bases long, consisting of two 300 nt (6 units), one 360 nt (7 units) and one 410 nt (8 units) DNA strands which are marked by blue, purple, green and orange colors. The staples are all marked by black color. The sequences are listed in Table S6.

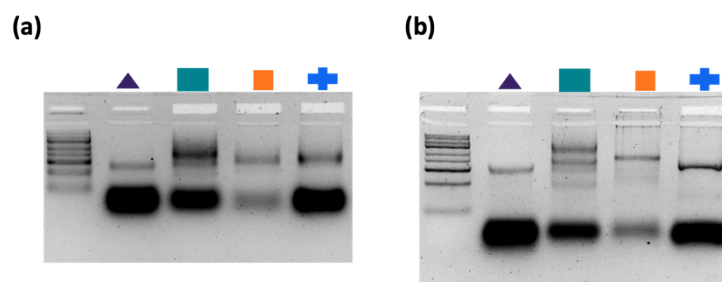

Fig. S7. The agarose gel electrophoresis (AGE, 2% w/v) images of four shapes nanostructures in the buffers containing a)  $1\times\text{TAE-Mg}^{2+}$  ( $12.5\text{ mM Mg}^{2+}$ ) under 60 V, 1 h and b)  $0.5\times\text{TBE}$  under 60 V, 1 h. Lane 1-4: triangle shape MUD-triangle, MUD-rectangle, MUD-square, MUD-cross. The makers are GeneRuler Express DNA Ladder, Thermo Fisher Scientific.

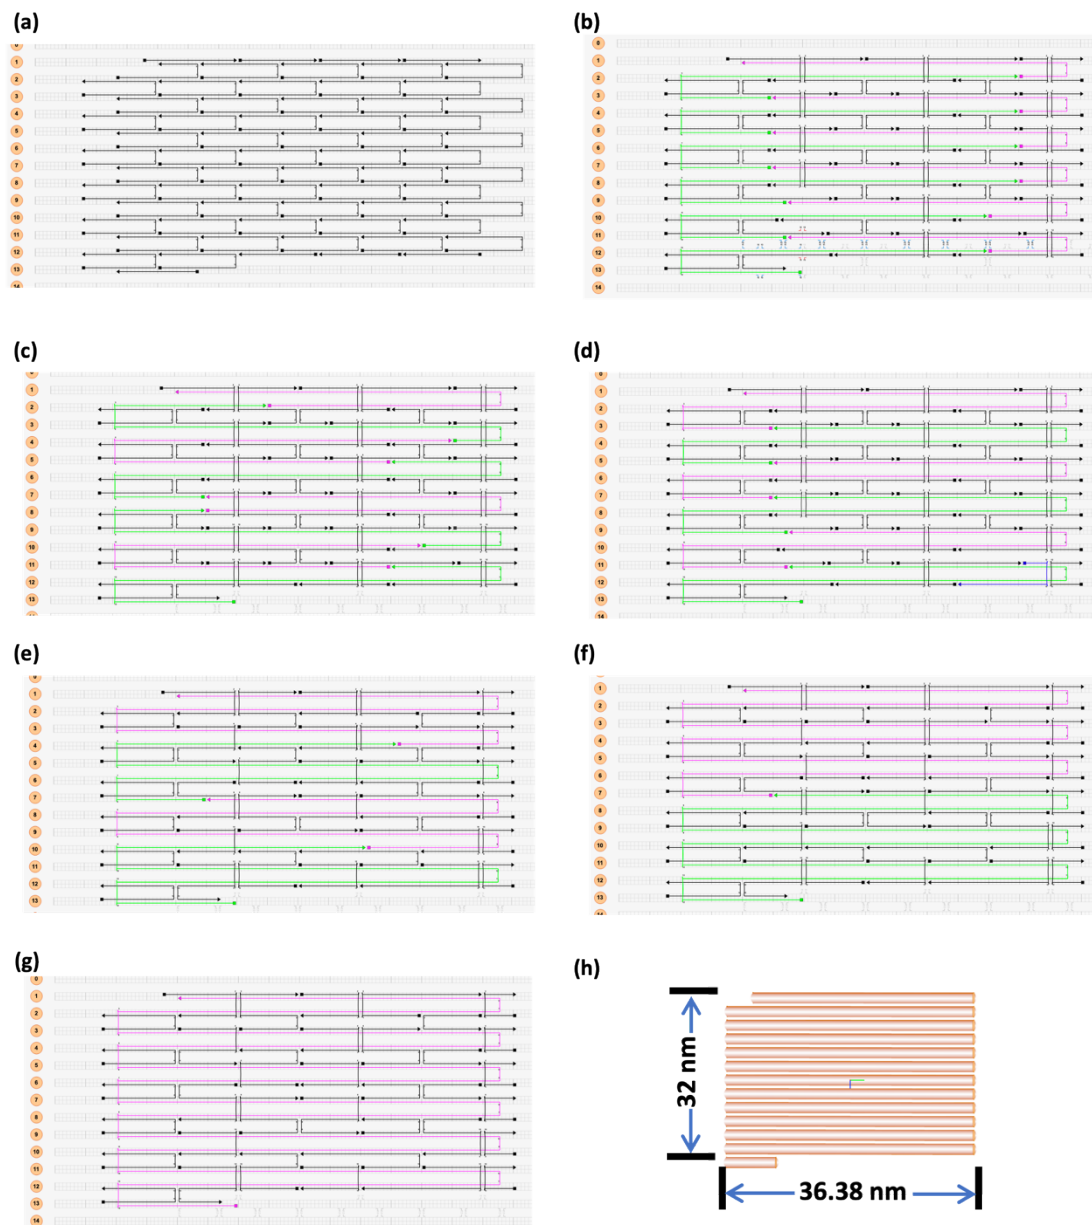

Fig. S8. The arrangement of DNA strands in MUD-xU ( $x=1\sim 4, 6, 12, 24$ ) with gradually increasing in length designed in caDNAno software. The MUD-xU ( $x=1\sim 4, 6, 12, 24$ ) were consisted of a) all short ssDNA bricks MUD-1U marked by black color, staples marked by black color with b) twelve MUD-2U of length of nearly 100 nt , c) eight MUD-3U of length of nearly 150 nt, d) six MUD-4U of length of nearly 200 nt , e) four MUD-6U of length of nearly 300 nt , f) two MUD-12U of length of nearly 600 nt , g) one MUD-24U of length of 1228 nt , which are marked by magenta and adjacent green colors. The corresponding sequences are listed in Table S7-13. h) The size details of the MUD-xU series DNA nanostructures.

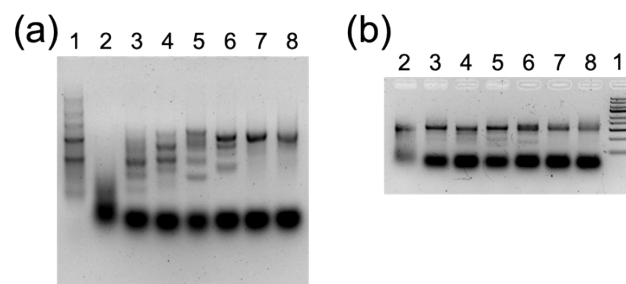

Fig. S9. The images of MUD-xU series samples under agarose gel electrophoresis with a)  $1 \times$  TAE- $Mg^{2+}$  (2 mM  $Mg^{2+}$ ) and b)  $1 \times$  TAE- $Mg^{2+}$  (7 mM  $Mg^{2+}$ ). All the MUD-xU samples were assembled with a 20 mM  $Mg^{2+}$  in buffer. Lane 1-8: double stranded DNA ladder (GeneRuler Express DNA Ladder, Thermo Fisher Scientific), MUD-1U, MUD-2U, MUD-3U, MUD-4U, MUD-6U, MUD-12U, MUD-24U.

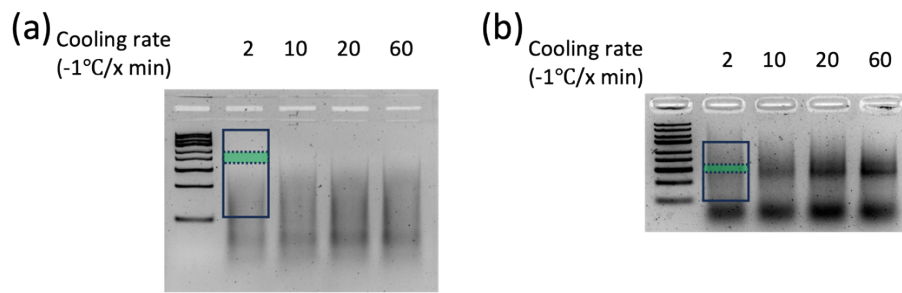

Fig. S10. The gel images of MUD-1U at cooling rate of -1 °C/2 minutes, -1 °C/10 minutes, -1 °C/20 minutes, -1 °C/60 minutes under agarose gel electrophoresis with a) 0.5×TBE and b) 1×TAE-12.5 mM Mg<sup>2+</sup> buffers. The intact assembly bands were masked in green, the total areas excluding the bands of excess short DNA strands were marked by blacked boxes.

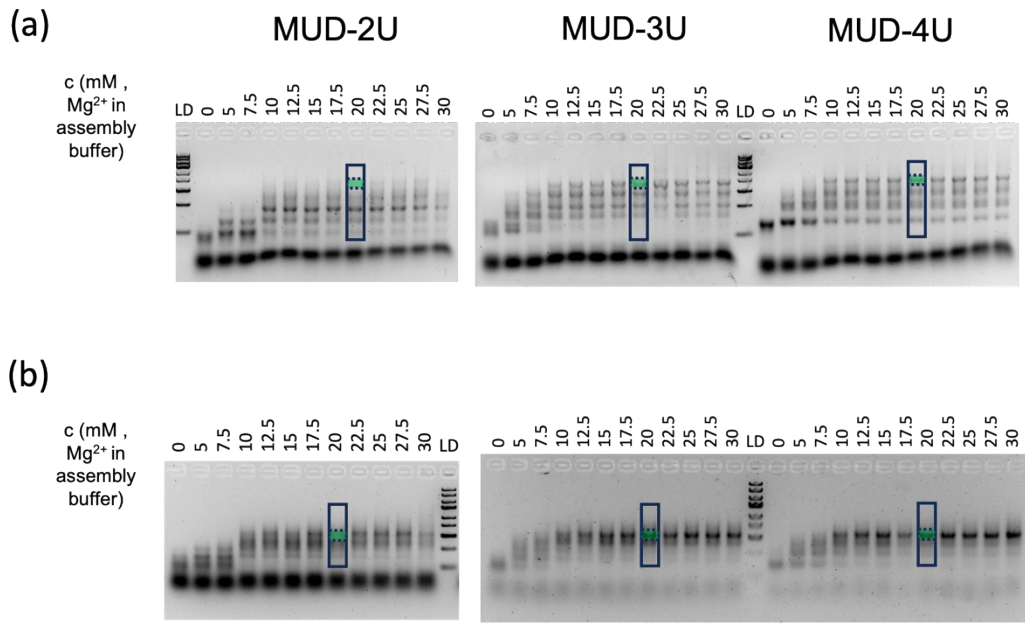

Fig. S11. The gel images of MUD-2U, MUD-3U, MUD-4U with gradient Mg<sup>2+</sup> ion assembly concentrations and a cooling rate with -1 °C/2 minutes under agarose gel electrophoresis with a) 0.5×TBE and b) 1×TAE-12.5 mM Mg<sup>2+</sup> buffers. The intact assembly bands were masked in green, the total areas excluding the bands of excess short DNA strands were marked by blacked boxes.

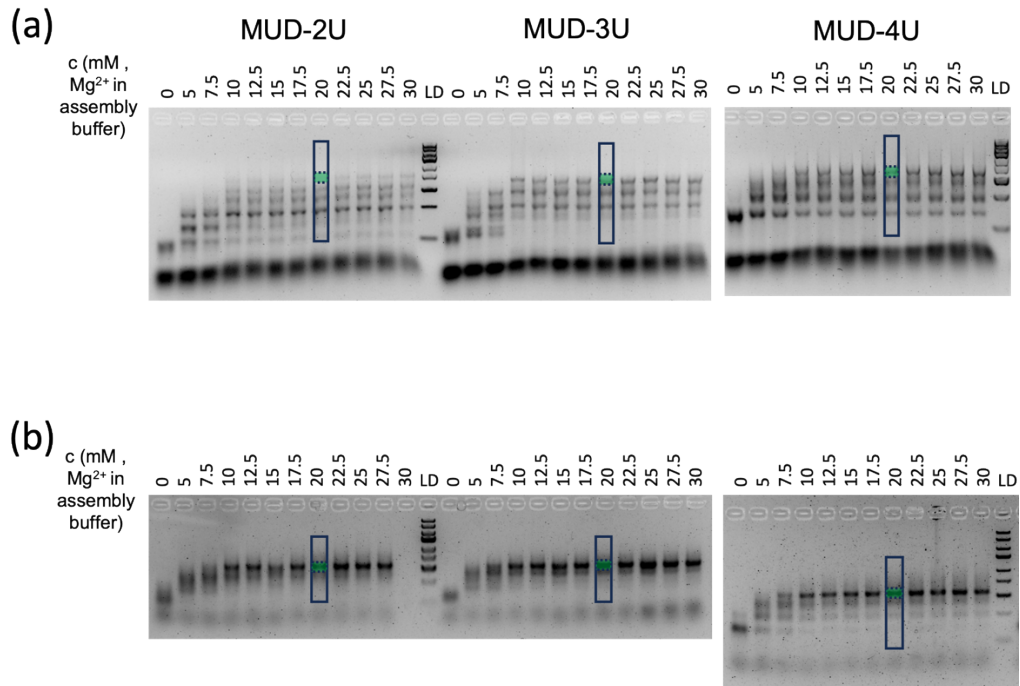

Fig. S12. The gel images of MUD-2U, MUD-3U, MUD-4U with gradient Mg<sup>2+</sup> ion assembly concentrations and a cooling rate with -1 °C/10 minutes under agarose gel electrophoresis with a) 0.5×TBE and b) 1×TAE-12.5 mM Mg<sup>2+</sup> buffers. The intact assembly bands were masked in green, the total areas excluding the bands of excess short DNA strands were marked by blacked boxes.



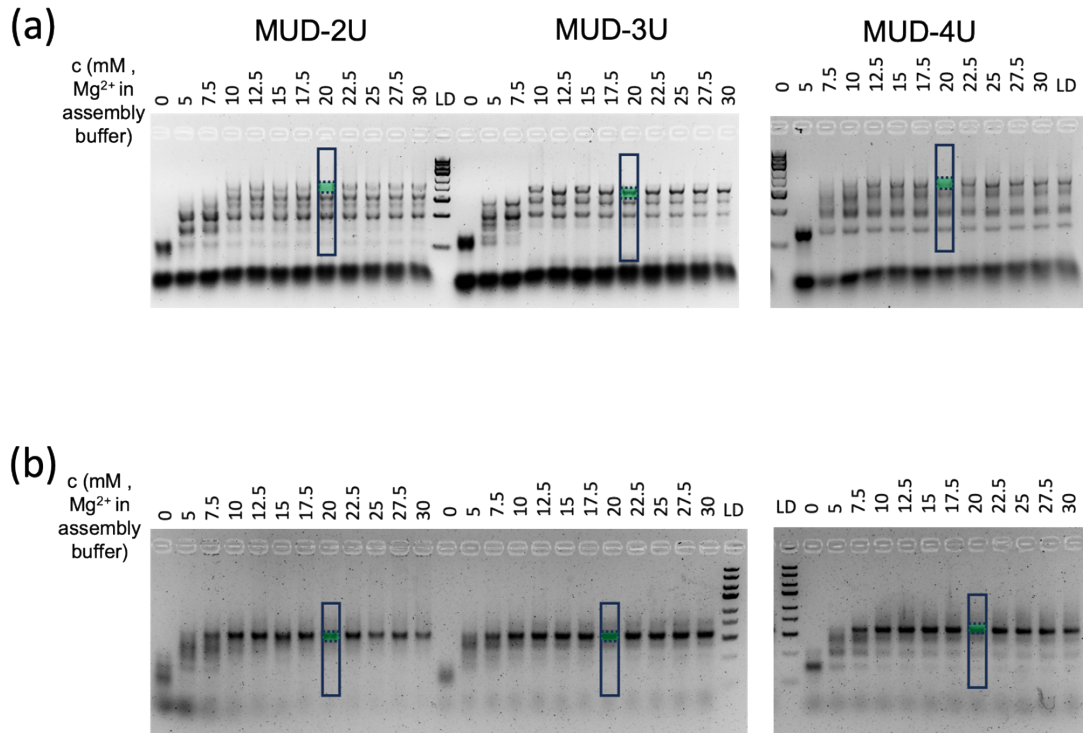

Fig. S13. The gel images of MUD-2U, MUD-3U, MUD-4U with gradient Mg<sup>2+</sup> ion assembly concentrations and a cooling rate with -1 °C/30 minutes under agarose gel electrophoresis with a) 0.5×TBE and b) 1×TAE-12.5 mM Mg<sup>2+</sup> buffers. The intact assembly bands were masked in green, the total areas excluding the bands of excess short DNA strands were marked by blacked boxes.

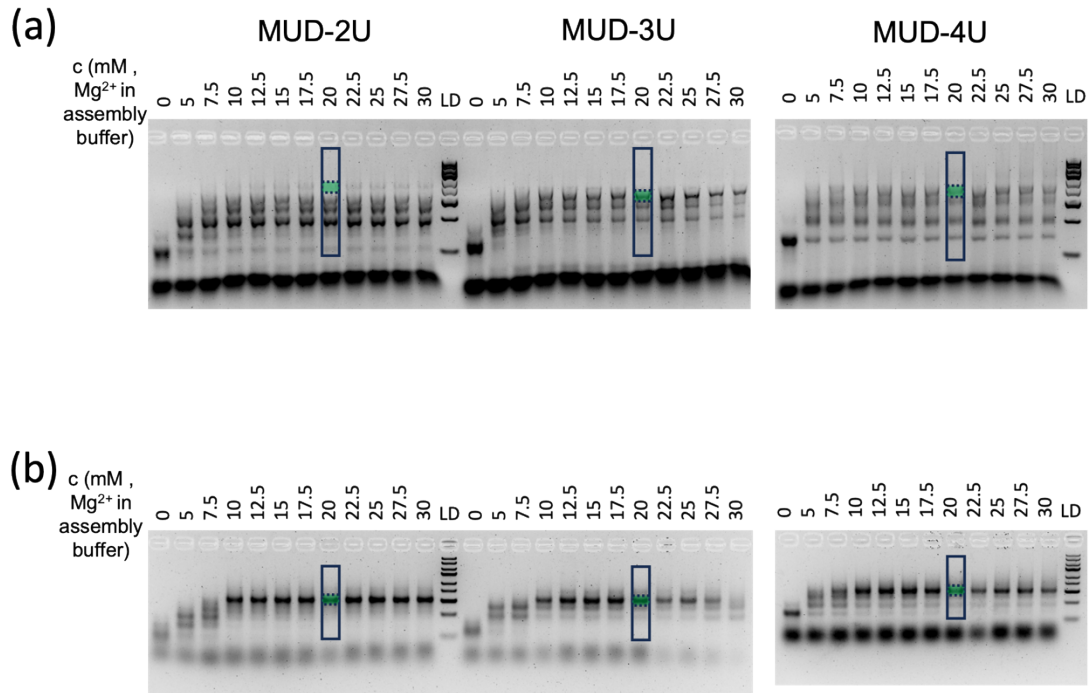

Fig. S14. The gel images of MUD-2U, MUD-3U, MUD-4U with gradient Mg<sup>2+</sup> ion assembly concentrations and a cooling rate with -1 °C/60 minutes under agarose gel electrophoresis with a) 0.5×TBE and b) 1×TAE-12.5 mM Mg<sup>2+</sup> buffers. The intact assembly bands were masked in green, the total areas excluding the bands of excess short DNA strands were marked by blacked boxes.

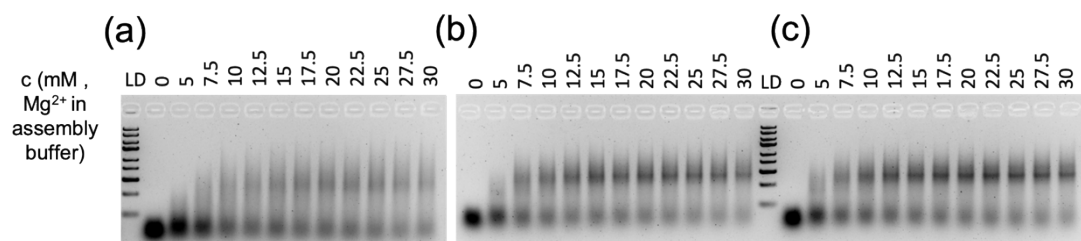

Fig. S15. The gel images of MUD-1U with gradient  $Mg^{2+}$  ion assembly concentrations and a cooling rate with a)  $-1\text{ }^{\circ}C/2$  minutes, b)  $-1\text{ }^{\circ}C/10$  minutes, c)  $-1\text{ }^{\circ}C/30$  minutes under agarose gel electrophoresis with  $1\times TAE-12.5\text{ mM }Mg^{2+}$  buffer.

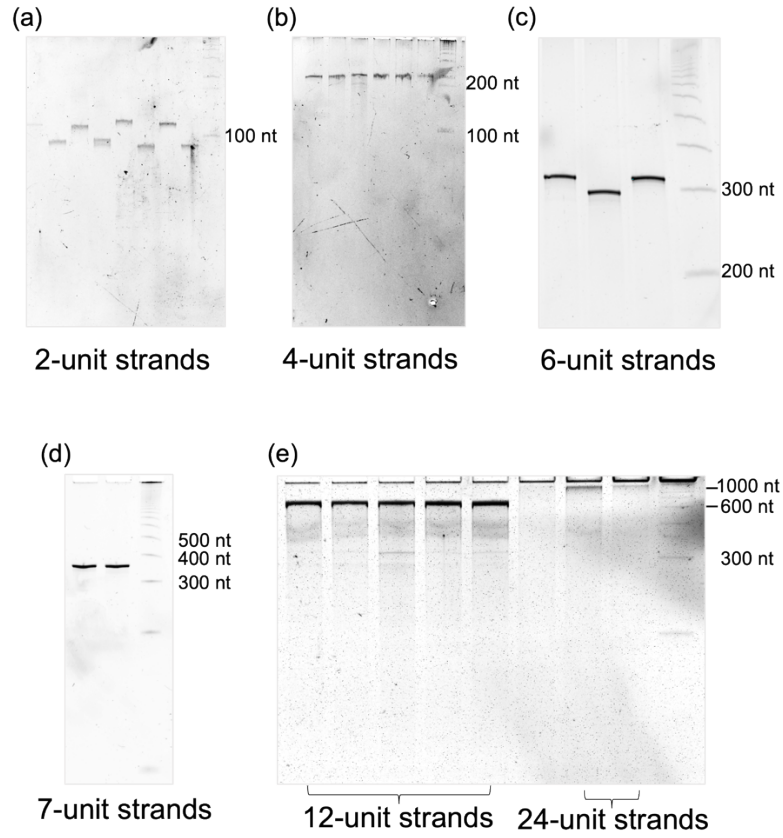

Fig.S16. The denatured Polyacrylamide gel electrophoresis of the multiple-unit DNA strands. a) the 2-unit strands, b) the 4-unit strands, c) the 6-unit strands, d) the 7-unit strands, e) the 12-unit strands and the 24-unit strands.

Sequences (5'→3')

Table S1. Sequences of the DNA bricks with a square shape, where the italicized parts are shared by MUD-1U.

|                               |                                                     |
|-------------------------------|-----------------------------------------------------|
| a13.1-b13.1                   | CCCGAAGTACCTCTGCAGGAT                               |
| a13.2-b13.2                   | CGTTACCAGGCTACGATGAGT                               |
| a13.3-b13.3                   | CTGTCCCACCTCTCCTTCAAAT                              |
| a13.4-b13.4                   | CATTATATTGCTCCTGAGGGT                               |
| a13.5-b13.5                   | CGTGCATGCCCTCCCAAACCTT                              |
| <i>T10-b14.1-a13.1*-T10</i>   | <i>TTTTTTTTTTTTGTTACTTGATGGTACTTCGGGTTTTTTTTTTT</i> |
| a14.2-b14.2-a13.2*-<br>b13.1* | CCGATGCGACTTGATATGTCTGCCTGGTAACGATCCTGCAGA          |
| a14.3-b14.3-a13.3*-<br>b13.2* | CGCTGCCAGCTTCAGGGCCTTGAGTGGGACAGACTCATCGT<br>A      |
| a14.4-b14.4-a13.4*-<br>b13.3* | CAGAAGGGTCTGTGTAAGTGTGCAATATAATGATTTGAAGGA          |
| a14.5-b14.5-a13.5*-<br>b13.4* | CGAGCGCCGCTGCGGCTATTTGGGCATGCACGACCCTCAGG<br>A      |
| a14.6-T11-T11-b13.5*          | CAGGAGGCTCTTTTTTTTTTTTTTTTTTTTTTTAAGTTTGGGA         |
| a15.1-b15.1-a14.2*-<br>b14.1* | CTGGGCAAGCCTTATTGCGATGTCGCATCGGATCAAGTAACA          |
| a15.2-b15.2-a14.3*-<br>b14.2* | CGTGCGGTCCCTACGCGCAGTGCTGGCAGCGAGACATATCA<br>A      |
| a15.3-b15.3-a14.4*-<br>b14.3* | CGCGGGCCGCTTTCAATTATGACCCTTCTGAAGGCCCTGAA           |
| a15.4-b15.4-a14.5*-<br>b14.4* | CTATCTTGTACTGCACCGGTTGCGGCGCTCGACAGTTACACA          |
| a15.5-b15.5-a14.6*-<br>b14.5* | CCAAACCGTCCTCCTACGTTTGAGCCTCCTGAAATAGCCGCA          |
| <i>T10-b16.1-a15.1*-T10</i>   | <i>TTTTTTTTTTTTGGCCCATCATGGCTTGCCAGTTTTTTTTTTT</i>  |
| a16.2-b16.2-a15.2*-<br>b15.1* | CAAGACATACTATTCTGTATTGGGACCGCACGATCGCAATAA          |
| a16.3-b16.3-a15.3*-<br>b15.2* | CTAGACCACCTCTTTCTTTATGGCGGCCCGCGACTGCGCGTA          |
| a16.4-b16.4-a15.4*-<br>b15.3* | CCCTTGTGGCTAAGGAGGTCTGTACAAGATAGATAATTGAAA          |
| a16.5-b16.5-a15.5*-<br>b15.4* | CACCGAACCCTTCCGCTCGCTGGACGGTTTGAACCGGTGC<br>A       |
| a16.6-T11-T11-b15.5*          | CCTGAAGTTCTTTTTTTTTTTTTTTTTTTTTTAAACGTAGGA          |
| a17.1-b17.1-a16.2*-<br>b16.1* | CTTTGGGTACCTAGACGGGTTGTATGTCTTGATGATGGGCCA          |
| a17.2-b17.2-a16.3*-<br>b16.2* | CGCATGTCCGCTCCAGAAAGTGGTGGTCTAGAATACAGAATA          |

|                               |                                                 |
|-------------------------------|-------------------------------------------------|
| a17.3-b17.3-a16.4*-<br>b16.3* | CTAAGGACGTCTCCAATTCATGCCACAAGGGATAAAGAAAGA      |
| a17.4-b17.4-a16.5*-<br>b16.4* | CAAATGCATACTTTGTTTAGTGGGTTTCGGTGAGACCTCCTTA     |
| a17.5-b17.5-a16.6*-<br>b16.5* | CACTTAGAGTCTGGGCCCGGTGAACTTCAGGAGCGAGCGGA<br>A  |
| T10-b18.1-a17.1*-T10          | TTTTTTTTTTTTCCAGACTATGGTACCCAAAGTTTTTTTTTTT     |
| a18.2-b18.2-a17.2*-<br>b17.1* | CGTTTCGCTTCTGCTGGGCCGTGCGGACATGCGAACCCGTCT<br>A |
| a18.3-b18.3-a17.3*-<br>b17.2* | CACCCTTACCTTTCTGCCAATGACGTCCTTAGACTTTCTGGA      |
| a18.4-b18.4-a17.4*-<br>b17.3* | CGCCTCACACTGTCAGAGTTTGTATGCATTTGATGAATTGGA      |
| a18.5-b18.5-a17.5*-<br>b17.4* | CTAACCTGCCTGACCGATCGTGACTCTAAGTACTAAACAAA       |
| a18.6-T11-T11-b17.5*          | CGACGATACCTTTTTTTTTTTTTTTTTTTTTTTTACCGGGCCCA    |
| a19.1-b19.1-a18.2*-<br>b18.1* | CTGAGATGATCTCAAACGAATGAAGCGAACGATAGTCTGGAA      |
| a19.2-b19.2-a18.3*-<br>b18.2* | CCCTTCCCGCCTTAGGCGGCTGGTAAGGGTGACGGCCCAGC<br>A  |
| a19.3-b19.3-a18.4*-<br>b18.3* | CCTGGCTAGTCTATTGTTAATGTGTGAGGCGATTGGCAGAAA      |
| a19.4-b19.4-a18.5*-<br>b18.4* | CTACGTGGAGCTATTAGGGATGGCAGGTTAGAACTCTGACA       |
| a19.5-b19.5-a18.6*-<br>b18.5* | CTGACATTACCTCACAATCCTGGTATCGTCGACGATCGGTCA      |
| T10-b20.1-a19.1*-T10          | TTTTTTTTTTTTACCTTGCTTGATCATCTCAGTTTTTTTTTTT     |
| a20.2-b20.2-a19.2*-<br>b19.1* | CGCTTAAGTCTTGCGCTAATGGCGGGAAGGGATTTCGTTTGA      |
| a20.3-b20.3-a19.3*-<br>b19.2* | CCCTAGGCCCTAGCTGCATGTGACTAGCCAGGAGCCGCCTA<br>A  |
| a20.4-b20.4-a19.4*-<br>b19.3* | CTAAGCCTTCTGTAAATTCTTGCTCCACGTAGATTAACAATA      |
| a20.5-b20.5-a19.5*-<br>b19.4* | CGGGCTCCACTGTAAGTGCTTGGTAATGTCAGATCCCTAATA      |
| a20.6-T11-T11-b19.5*          | CTCTGTTATCTTTTTTTTTTTTTTTTTTTTTTTTAGGATTGTGA    |
| a21.1-b21.1-a20.2*-<br>b20.1* | CTTGCTTTGCCTCCTAACGATGACTTAAGCGAAGCAAGGTAA      |
| a21.2-b21.2-a20.3*-<br>b20.2* | CAATACACCGCTGCAAGACCTGGGCCTAGGGATTAGCGCCA<br>A  |
| a21.3-b21.3-a20.4*-<br>b20.3* | CTTGGGACGGCTTTGGAAATTGAAGGCTTAGACATGCAGCTA      |
| a21.4-b21.4-a20.5*-           | CCAATTAGGACTAATTTAGATGTGGAGCCCGAAGAATTAACA      |

|                                  |                                                |
|----------------------------------|------------------------------------------------|
| <i>b20.4*</i>                    |                                                |
| <i>a21.5-b21.5-a20.6*-b20.5*</i> | CTTTGGCCATCTTATCCAAATGATAACAGAGAAGCACTTACA     |
| <i>T10-b22.1-a21.1*-T10</i>      | TTTTTTTTTTTGTGTTTGTGGCAAAGCAAGTTTTTTTTTT       |
| <i>a22.2-b22.2-a21.2*-b21.1*</i> | CTCTGACGGCTACATTGAGGTGCGGTGATTGATCGTTAGGA      |
| <i>a22.3-b22.3-a21.3*-b21.2*</i> | CGGAAGTGCCTCCATGATTGTGCCGTCCCAAGAGGTCTTGC<br>A |
| <i>a22.4-b22.4-a21.4*-b21.3*</i> | CTACCATGGCTGCTCACGAGTGTCTAATTGGAATTTCCAAA      |
| <i>a22.5-b22.5-a21.5*-b21.4*</i> | CTTAGTCGGCTGCCGATAGTTGATGGCCAAAGATCTAAATTA     |
| <i>a22.6-T11-T11-b21.5*</i>      | CGCAAGCGCCTTTTTTTTTTTTTTTTTTTTTTTTATTGGATAA    |
| <i>a23.1-b23.1-a22.2*-b22.1*</i> | CATGCCTGCCCTTGCTAACTTGCCGTCAGAGAACAAACAACA     |
| <i>a23.2-b23.2-a22.3*-b22.2*</i> | CAAGACTATACTCAGGACGCTGGCACTTCCGACCTCAATGTA     |
| <i>a23.3-b23.3-a22.4*-b22.3*</i> | CACGCGCATCCTCCGTTTATTGCCATGGTAGACAATCATGGA     |
| <i>a23.4-b23.4-a22.5*-b22.4*</i> | CGTAAAGCTGCTATGGTCTATGCCGACTAAGACTCGTGAGCA     |
| <i>a23.5-b23.5-a22.6*-b22.5*</i> | CGTGAATGCACTCGGTAGACTGGCGCTTGCGAACTATCGGC<br>A |
| <i>T10-b24.1-a23.1*-T10</i>      | TTTTTTTTTTTCAGTATGTATGGGCAGGCATGTTTTTTTTTT     |
| <i>a24.2-b24.2-a23.2*-b23.1*</i> | CTGTATCGGCTTTAGTATAATGTATAGTCTTGAAGTTAGCAA     |
| <i>a24.3-b24.3-a23.3*-b23.2*</i> | CATCTGGGTCTACAAGACCCTGGATGCGCGTGAGCGTCCTG<br>A |
| <i>a24.4-b24.4-a23.4*-b23.3*</i> | CACAGATGTCTATTTGCGAGTGCAGCTTTACGAATAAACGGA     |
| <i>a24.5-b24.5-a23.5*-b23.4*</i> | CAGCGTGGACTCGTAACAATTGTGCATTCACGATAGACCATA     |
| <i>a24.6-T11-T11-b23.5*</i>      | CCGGCTCGCCTTTTTTTTTTTTTTTTTTTTTTTTAGTCTACCGA   |
| <i>a24.2*-b24.1*</i>             | GCCGATACAGATACATACTGA                          |
| <i>a24.3*-b24.2*</i>             | GACCCAGATGATTATACTAAA                          |
| <i>a24.4*-b24.3*</i>             | GACATCTGTGAGGGTCTTGTA                          |
| <i>a24.5*-b24.4*</i>             | GTCCACGCTGACTCGCAAATA                          |
| <i>a24.6*-b24.5*</i>             | GGCGAGCCGGAATTGTTACGA                          |

Table S2. Sequences of conventional square-shaped DNA origami, which scaffold is the former 1384 bases of M13mp18 viral DNA as follows.

|                  |                                                                                                                                                                                                                                                                                                                                                                                                                                                                                                                                                                                                                                                                                                                                                                                                                                                                                                                                                                                                                                                                                                                                                                                                                                                                                                                                                                                                                                                                                                                                                   |
|------------------|---------------------------------------------------------------------------------------------------------------------------------------------------------------------------------------------------------------------------------------------------------------------------------------------------------------------------------------------------------------------------------------------------------------------------------------------------------------------------------------------------------------------------------------------------------------------------------------------------------------------------------------------------------------------------------------------------------------------------------------------------------------------------------------------------------------------------------------------------------------------------------------------------------------------------------------------------------------------------------------------------------------------------------------------------------------------------------------------------------------------------------------------------------------------------------------------------------------------------------------------------------------------------------------------------------------------------------------------------------------------------------------------------------------------------------------------------------------------------------------------------------------------------------------------------|
| M13mp18-1384     | AATGCTACTACTATTAGTAGAATTGATGCCACCTTTTCAGCTCG<br>CGCCCCAAATGAAAATATAGCTAAACAGGTTATTGACCATTTG<br>CGAAATGTATCTAATGGTCAAACCTAAATCTACTCGTTCGCAGA<br>ATTGGGAATCAACTGTTATATGGAATGAAACTTCCAGACACCG<br>TACTTTAGTTGCATATTTAAAACATGTTGAGCTACAGCATTATA<br>TTCAGCAATTAAGCTCTAAGCCATCCGCAAAAATGACCTCTTA<br>TCAAAGGAGCAATTAAGGTAAGTCTCTAATCCTGACCTGTTG<br>GAGTTTGCTTCCGGTCTGGTTCGCTTTGAAGCTCGAATTA<br>CGCGATATTTGAAGTCTTTCGGGCTTCCCTCTTAATCTTTTTGAT<br>GCAATCCGCTTTGCTTCTGACTATAATAGTCAGGGTAAAGACC<br>TGATTTTTGATTTATGGTCATTCTCGTTTTCTGAACTGTTTAA<br>GCATTTGAGGGGGATTCAATGAATATTTATGACGATTCCGCAG<br>TATTGGACGCTATCCAGTCTAAACATTTTACTATTACCCCTCT<br>GGCAAACTTCTTTTGCAAAGCCTCTCGCTATTTTGGTTTTTA<br>TCGTCGTCTGGTAAACGAGGGTTATGATAGTGTGCTCTTACT<br>ATGCCTCGTAATTCCTTTTGGCGTTATGTATCTGCATTAGTTGA<br>ATGTGGTATTCCTAAATCTCAACTGATGAATCTTCTACCTGTA<br>ATAATGTTGTTCCGTTAGTTCGTTTTATTAACGTAGATTTTTCTT<br>CCCAACGTCCTGACTGGTATAATGAGCCAGTTCTTAAAATCGC<br>ATAAGTAATTCACAATGATTAAGTTGAAATTAACCATCTCA<br>AGCCCAATTTACTACTCGTTCGTTCTGGTGTTCGTCAGGGCAAG<br>CCTTATTCCTGAATGAGCAGCTTTGTTACGTTGATTTGGGTA<br>ATGAATATCCGGTCTTGTCAAGATTACTCTTGATGAAGGTCA<br>GCCAGCCTATGCGCCTGGTCTGTACACCGTTCATCTGTCTCTT<br>TTCAAAGTTGGTCAGTTCGGTTCCTTATGATTGACCGTCTGC<br>GCCTCGTTCGGCTAAGTAACATGGAGCAGGTCGCGGATTTT<br>GACACAATTTATCAGGCGATGATACAAATCTCCGTTGTACTTT<br>GTTTCGCGCTTGGTATAATCGCTGGGGGTCAAAGATGAGTGT<br>TTTAGTGATTCTTTTGCCTCTTTCGTTTTAGGTTGGTGCCTTC<br>GTAGTGGCATTACGATTTTACCCGTTAATGGAACTTCCCTCA<br>TGAAAAAGTCTTTAGTCTCAAAGCCTCTGTAGCCGTTGCTAC<br>CCTCGTTCGATGCTGTCTTTCGCTGCTGAGGGTGACGAT |
| M13-sq-Origa-St1 | AACATACGAGCCGGAAGCATAAAGACTCACAT                                                                                                                                                                                                                                                                                                                                                                                                                                                                                                                                                                                                                                                                                                                                                                                                                                                                                                                                                                                                                                                                                                                                                                                                                                                                                                                                                                                                                                                                                                                  |
| M13-sq-Origa-St2 | TGTTATCCGCTCACAACTTTC                                                                                                                                                                                                                                                                                                                                                                                                                                                                                                                                                                                                                                                                                                                                                                                                                                                                                                                                                                                                                                                                                                                                                                                                                                                                                                                                                                                                                                                                                                                             |
| M13-sq-Origa-St3 | TTTTCTCGAATTCGTAATCATGGTCATAGCTGACTCTAG                                                                                                                                                                                                                                                                                                                                                                                                                                                                                                                                                                                                                                                                                                                                                                                                                                                                                                                                                                                                                                                                                                                                                                                                                                                                                                                                                                                                                                                                                                           |
| M13-sq-Origa-St4 | TTTTCTAATGAGTGAGCTATGTAAAGCCTGGGGTGT                                                                                                                                                                                                                                                                                                                                                                                                                                                                                                                                                                                                                                                                                                                                                                                                                                                                                                                                                                                                                                                                                                                                                                                                                                                                                                                                                                                                                                                                                                              |
| M13-sq-Origa-St5 | TAATTGCGTGAATCGGCCAACGCGGGTGGTTT                                                                                                                                                                                                                                                                                                                                                                                                                                                                                                                                                                                                                                                                                                                                                                                                                                                                                                                                                                                                                                                                                                                                                                                                                                                                                                                                                                                                                                                                                                                  |
| M13-sq-Origa-St6 | CAGTCGAAGCTGTGCCGGAACCTGTACACAGC                                                                                                                                                                                                                                                                                                                                                                                                                                                                                                                                                                                                                                                                                                                                                                                                                                                                                                                                                                                                                                                                                                                                                                                                                                                                                                                                                                                                                                                                                                                  |
| M13-sq-Origa-St7 | TGCAGGTCGTTTCCTGTGTGAAAT                                                                                                                                                                                                                                                                                                                                                                                                                                                                                                                                                                                                                                                                                                                                                                                                                                                                                                                                                                                                                                                                                                                                                                                                                                                                                                                                                                                                                                                                                                                          |
| M13-sq-Origa-St8 | AGGATCCCTTCCAGTCACGACGTTGTGCTGC                                                                                                                                                                                                                                                                                                                                                                                                                                                                                                                                                                                                                                                                                                                                                                                                                                                                                                                                                                                                                                                                                                                                                                                                                                                                                                                                                                                                                                                                                                                   |
| M13-sq-Origa-St9 | TGCATTAATTGCGCTCACTGCCCGTTCCACAC                                                                                                                                                                                                                                                                                                                                                                                                                                                                                                                                                                                                                                                                                                                                                                                                                                                                                                                                                                                                                                                                                                                                                                                                                                                                                                                                                                                                                                                                                                                  |



|                   |                                                      |
|-------------------|------------------------------------------------------|
| M13-sq-Origa-St10 | TTTTACGCCAGGGTTCGGGTACCGAGTTTT                       |
| M13-sq-Origa-St11 | TTTTGCGTATTGGGCGCCAGCGGGGAGAGGCGGTTTTTTTT            |
| M13-sq-Origa-St12 | TTCTTTTCTGCAGCAAGCGGTCCATTGATGGT                     |
| M13-sq-Origa-St13 | TGATTGCGCCATATTACCCTTCACCGCTATAA                     |
| M13-sq-Origa-St14 | AAGGGGGATGTAAAACGACGGCCATGCATGCC                     |
| M13-sq-Origa-St15 | AAGGCGATTTGGGAAGGGCGATCGCAGGCAA                      |
| M13-sq-Origa-St16 | GAGAGAGTACCAGTGAGACGGGCAGTGCCAGC                     |
| M13-sq-Origa-St17 | TTTTCTGCGCAACTGTAAGTTGGGTATTTT                       |
| M13-sq-Origa-St18 | TTTTCAGGCGAAAATCCTGTGCGCTGGTTTGCCCCAGTTTT            |
| M13-sq-Origa-St19 | GGTTCCGATGTTCCAGTTTGGAAACCGTCAAAG                    |
| M13-sq-Origa-St20 | ATCAAAACCGCCCGGCAGAATAGCCCGTCAAA                     |
| M13-sq-Origa-St21 | CCGAAACGTGCGGGCCTCTTCGCGCTGGCGA                      |
| M13-sq-Origa-St22 | GCGCCATTGGCCTCAGGAAGATCGCCGTGCAT                     |
| M13-sq-Origa-St23 | TTGAGTGTAATCGGCAAAATCCCTCTGGCCCT                     |
| M13-sq-Origa-St24 | TTTTACGACAGTATCCGCCATTGAGTTTTT                       |
| M13-sq-Origa-St25 | TTTTAGAACGTGGACTCCAAAAGAGTCCACTATTAATTTT             |
| M13-sq-Origa-St26 | GGCGAAAAGATAAATTAATGCCGGGCTATCAG                     |
| M13-sq-Origa-St27 | TCACCAGTGACGTTGTCAATA                                |
| M13-sq-Origa-St28 | CATCGTAACACTCCAGCCAGCTTTTTCTGGTG                     |
| M13-sq-Origa-St29 | CTGCCAGTAAACGGCGGATTGACCGTGAGCGAGTAACAACGC<br>CATCAA |
| M13-sq-Origa-St30 | TTCTAGCTACCGTCTATCAGACAGAGATAGGG                     |
| M13-sq-Origa-St31 | TGATAAACAAAGAGAATCAGCTGTAGCCGATGA                    |
| M13-sq-Origa-St32 | TTTTTCCGTGGGAACCTTGAGGGGACGTTTT                      |
| M13-sq-Origa-St33 | TTTTTGAGAGATCTACAAAGAGAGGGTAGCTATTTTTTTTT            |
| M13-sq-Origa-St34 | GTCATTGCTGTCAATCATATGTACGGAAGATT                     |
| M13-sq-Origa-St35 | ATTAATGTAATGGGATAGGTCAGATGGGCG                       |
| M13-sq-Origa-St36 | AACTAGCACTGAGAGTCTGGAGCATTCAACCG                     |
| M13-sq-Origa-St37 | ACGGTAACGTTAATATTTTGTTAAAATTC                        |
| M13-sq-Origa-St38 | AAATAATTTTTTTGTTAAATCAGCTCATTTTTTAATTTT              |
| M13-sq-Origa-St39 | TTTTCCAATAGGAACCCGTCGGATTCTTTT                       |
| M13-sq-Origa-St40 | TTTTAAAAGCCCCAAAACACCCGGTTGATAATCAGTTTT              |
| M13-sq-Origa-St41 | GTATAAGCAAATATTTAAATTGTAATCGTAA                      |
| M13-sq-Origa-St42 | GCATTAACGCGTCTGGCCTTCCTTTCATCAAC                     |

Table S3. Sequences of square-shaped DNA origami with multiple-unit DNA strands in length of 360 nt (7 units), 410 nt (8 units) and 614 nt (12units).

|                        |                                                                                                                                                                                                                                                                                                                                                                                                                                                                                                                                                                                                                                                                                   |
|------------------------|-----------------------------------------------------------------------------------------------------------------------------------------------------------------------------------------------------------------------------------------------------------------------------------------------------------------------------------------------------------------------------------------------------------------------------------------------------------------------------------------------------------------------------------------------------------------------------------------------------------------------------------------------------------------------------------|
| ACTB-GFP-L<br>(410 nt) | CCTCGGCTCACAGCGCGCCCGGCTATTCTCGCAACTGACAATGG<br>TGAGCAAGGGCGAGGAGCTGTTACCGGGGTGGTGCCCATCCT<br>GGTCGAGCTGGACGGCGACGTAAACGGCCACAAGTTCAGCGTGT<br>CCGGCGAGGGCGAGGGCGATGCCACCTACGGCAAGCTGACCCT<br>GAAGTTCATCTGCACCACCGGCAAGCTGCCCGTGCCCTGGCCCA<br>CCCTCGTGACCACCCTGACCTACGGCGTGACGTGCTTCAGCCGC<br>TACCCCGACCACATGAAGCAGCAGACTTCTTCAAGTCCGCCATG<br>CCCGAAGGCTACGTCCAGGAGCGCACCATCTTCTTCAAGGACGA<br>CGGCAACTACAAGACCCGCGCCGAGGTGAAGTTCGAGGGCGAC<br>ACCCTGGTGAACCGCA                                                                                                                                                                                                                      |
| CAR-3 (360 nt)         | GTTTTCTTAAAAATGAACAGTCTGCAAAGTACGACACAGCCATTT<br>ACTACTGTGCCAAACATTATTACTACGGTGGTAGCTACGCTATGG<br>ACTACTGGGGCCAAGGAACCTCAGTCACCGTCTCCTCAACCACG<br>ACGCCAGCGCCGCGACCACCAACACCGGCGCCACCATCGCGT<br>CGCAGCCCCTGTCCCTGCGCCAGAGGCGTGCCGGCCAGCGGC<br>GGGGGGCGCAGTGACACAGAGGGGGCTGGACTTCGCCTGTGAT<br>ATCTACATCTGGGCGCCCTTGGCCGGGACTTGTGGGGTCTTCT<br>CCTGTCACTGGTTATCACCTTTACTGCAAACGGGGCAGAAAGAA<br>ACTCCTG                                                                                                                                                                                                                                                                               |
| Gfc-R (614 nt)         | TGGGCGTAGATCATTGCTAAACTAACTCGGACGCAGGGGCACC<br>CAGGCCAGCGTGACAGCAAGTAGTCGTCTACCCCATTTTCGTGT<br>TTGAGAGACTGCAACCGGTTTTTAAGCAGTCCCCTTGGGTGGAAA<br>GCGGAGTAATAGTTGGCAGCAAATGTAGCCGATCCGCATGCGC<br>ACTTCACTCCGTGGTGACCGTAAAGTTCCACGGCGAGTCTGATCG<br>CGATGCTATGTGAATCCCACCGACACGTTGCGGCATTAACAGCCT<br>AAGTCAATTACTCACACAATCTCTTTGTTGATTATTCTATTGTCACG<br>CGGTACCTACGCCCTAGAGCTTTTGGACTTGTATTTAGTACGGTG<br>TGTAAGTGGCGGGCCGCTGCCGGGACCCGGATTGAGTGCCT<br>CCTGGTAAGAAGCTACTGTGCCTTTCTTCTTAGCGCTGAAGATA<br>ATCGGTCTTAATCCCTCATATAACCTCCAGTTAAATCAAGTGTCT<br>CGATAGCTCGTTCTGGATGAGGTAGTGTGGTTTATTGAATAGGT<br>GTGAAGAAAATATTTGTTAATTAGGTGATATAAAGTAGAGTTAAAT<br>AAAGTGTATGGATAGGTGGTTGTGTATG |
| 2-9-r-seam-1           | CCACCCCGGTGAACAGCTCCTCGCCGGGCGCG                                                                                                                                                                                                                                                                                                                                                                                                                                                                                                                                                                                                                                                  |
| 2-9-r-seam-2           | CGTCCAGCTCGACCAGTTCTG                                                                                                                                                                                                                                                                                                                                                                                                                                                                                                                                                                                                                                                             |
| 2-9-r-seam-3           | TTTTTCGCCCTCGCCGACACGCTGAACTTGGTCAGCTT                                                                                                                                                                                                                                                                                                                                                                                                                                                                                                                                                                                                                                            |
| 2-9-r-seam-4           | TTTTTCAGTTGCGAGAATAGCCCTTGCTCACCATTTGTTTTT                                                                                                                                                                                                                                                                                                                                                                                                                                                                                                                                                                                                                                        |
| 2-9-r-seam-5           | CTGTGAGCAGGAGAAGGACCCCACTCACAGGC                                                                                                                                                                                                                                                                                                                                                                                                                                                                                                                                                                                                                                                  |
| 2-9-r-seam-6           | CCCGTGTGGTTGCCGTTGCAGTAAAGTGCGC                                                                                                                                                                                                                                                                                                                                                                                                                                                                                                                                                                                                                                                   |
| 2-9-r-seam-7           | ACTTCAGGTGGCCGTTTACGTCGC                                                                                                                                                                                                                                                                                                                                                                                                                                                                                                                                                                                                                                                          |
| 2-9-r-seam-8           | GCCGTAGGGGTCACGAGGGTGGGCGGGTAGCG                                                                                                                                                                                                                                                                                                                                                                                                                                                                                                                                                                                                                                                  |

|               |                                                      |
|---------------|------------------------------------------------------|
| 2-9-r-seam-9  | CCAGTGACCGAGGCAGGAGTTTCTGATGGGCA                     |
| 2-9-r-seam-10 | TTTTTAGGTCAGGGTTGGCATCGCCCTTTT                       |
| 2-9-r-seam-11 | TTTTCGCCAGATGTAGATAAAGTCCCGGCCAAGGGTTTT              |
| 2-9-r-seam-12 | GAAGTCCAGGGACAGGGGCTGCGAGCGCTGGC                     |
| 2-9-r-seam-13 | CCCCGTCGTGAGAAGCCGCTGGCCGGGAGGT                      |
| 2-9-r-seam-14 | TGTGGTCGCAGGGCACGGGCAGCTGCAGATGA                     |
| 2-9-r-seam-15 | GCTGAAGCCTGGACGTAGCCTTCGTTGTAGTT                     |
| 2-9-r-seam-16 | TGGGCGCAGCCCCCTCGTGTGCACGGTGATAA                     |
| 2-9-r-seam-17 | TTTTATGGTGCCTCACTGCACGCCGTTTT                        |
| 2-9-r-seam-18 | TTTTGGTGTGGTGGTCGCGCGGATGGTGGGCGCCTTTT               |
| 2-9-r-seam-19 | GTCGTGGTACCGTAGTAATAATGTTTGCAGAC                     |
| 2-9-r-seam-20 | TCCTTGAACCTCCTCGGCCCCAGTAGTAGAAC                     |
| 2-9-r-seam-21 | CGCGGGTCGGCATGGCAGGACTTGACTGCTTCA                    |
| 2-9-r-seam-22 | GCCGTCGTATCTACGCCCATGCGGGCCTGGGT                     |
| 2-9-r-seam-23 | TAGCTACCTGAGGAGACGGTGACTCACGCCTC                     |
| 2-9-r-seam-24 | TTTTTTTAGCGAATGCCTTGAAGAAGTTTT                       |
| 2-9-r-seam-25 | TTTTTGCTGTGTCGTCAGTTTGGCACAGTAGTAAATTTT              |
| 2-9-r-seam-26 | TGTTATTATATGAGGGAATTAAGACAGTAGC                      |
| 2-9-r-seam-27 | GAGCTAGACTATAGACTCGAGA                               |
| 2-9-r-seam-28 | GCACGCTGTTACCAGGGTGTGCCACCTCGG                       |
| 2-9-r-seam-29 | GCCCCTGCCCGGTTGCAGTCTCTCTATTACTCCGCTTTCCCTTTA<br>CGG |
| 2-9-r-seam-30 | TGGAGGTTTTTAAGAAAACCATCCCCATAGCG                     |
| 2-9-r-seam-31 | CACTTGGGTCCCGGCACGGCTCGGATGGCGGC                     |
| 2-9-r-seam-32 | TTTTCTGCTTAAAAGTCCGAGTTAGTTTT                        |
| 2-9-r-seam-33 | TTTTGCTAAGGAAGAAAGGCACCGATTATCTTCAGCTTTT             |
| 2-9-r-seam-34 | TTCTTACCCTAAATACAAGTCCAAGAATAATC                     |
| 2-9-r-seam-35 | TGCCAACAAACACGAAAATGGGGCTTCGTCT                      |
| 2-9-r-seam-36 | ACACCGTAAGGACGCACTGAATCCGATTTAAC                     |
| 2-9-r-seam-37 | CCGCCGACTTAGGCTGTTAATGCCGCAAC                        |
| 2-9-r-seam-38 | TCACCACGGGGATTCACATAGCATCGCGATCAGACTTTT              |
| 2-9-r-seam-39 | TTTTTCGCCGTGGAACCCAAGGGGATTTT                        |
| 2-9-r-seam-40 | TTTTGTACCGCGTGACAATAAAGCTCTAGGGCGTAGTTTT             |
| 2-9-r-seam-41 | AACAAAGAGATTGTGTGAGTAATTACTAGTAC                     |
| 2-9-r-seam-42 | GTGTCGGTGAGTGAAGTGCGCATGACATTTTGC                    |

Table S4. Sequences of MUD-triangle with two multiple-unit DNA strands in length of 400 nt (8 units).

|                |                                                                                                                                                                                                                                                                                                                                                                                                                                                 |
|----------------|-------------------------------------------------------------------------------------------------------------------------------------------------------------------------------------------------------------------------------------------------------------------------------------------------------------------------------------------------------------------------------------------------------------------------------------------------|
| sma4(400 nt)   | TGTATCTGAATGGTCGTCGTCTTCTACCAGGTGGACTCATGGTTT<br>ATGAGGATGAAGTCTGGACCAAAGAAGATGAAGAGGAATACTCTA<br>ACCCTGACAACCATCTCCCTCCTATGGAAGTCGGGTCTGAGTCCC<br>TCTAAACCCTTTCCCAAACCCTTTCTTACTTTTTCTGTTGTCTGTTG<br>TCCCTTGTCTGATCCTATCATTCTTCTGTGAGCGAAGCGAACCC<br>CTATACCCGCACCCCAGCCTAACGTGTCTAATTTGAGACATTTTGT<br>CGGATTTGAGACATTTTGTCTCCCATGAAACCCGGGGTTTAAAAGA<br>ATATAATAAAAGATATTAGGGCGCAAGGCGGGAGTATTACGCGGT<br>AGCGCCCAAGCCTTGCCTTATTTGCGGAGCTGTACT |
| sma5(400 nt)   | AGACCTAGCTCGCCCGGTGCCCAAACCTGAACCGGTCTTCTGA<br>CAGCAGGTCGTATTTTGGATATTCATTTGTAACAAACAACTCTT<br>GGACTTTCTATCCACATTTCTTCCCAGCTATACCTGTCTGCCACA<br>TGTACCCATTTTTGATGCTTTCAATTGCTGACCATGTTTCTTTTGC<br>TTGCTTGCTTCTGCTCTTGGGATGTGAAAATGTATGTACCAAG<br>CTTTGCTCGTTTCATACACATACGCATTATATCTTTCCCTGTAAGA<br>CCAGATGGAATATTGATTGCCATATTCTTCATACACATATACTTTG<br>TAACAAACGACTTTCCAGTGTTCACGCAGGTCTATAATACAGTC<br>TACTTCTCTGTCGTTTTGTTTCAGGTCTACTAAGT        |
| 2-400-tri-st1  | ACGACCATTCATTTTTTTTTTGGATACATTTT                                                                                                                                                                                                                                                                                                                                                                                                                |
| 2-400-tri-st2  | TTTTAGACGGTAGATTTT                                                                                                                                                                                                                                                                                                                                                                                                                              |
| 2-400-tri-st3  | TTTTCATAAATCCTTTTT                                                                                                                                                                                                                                                                                                                                                                                                                              |
| 2-400-tri-st4  | TTTTTATTCCTCTTCATCTTGTTGTCAGGGTTAGAGTTTT                                                                                                                                                                                                                                                                                                                                                                                                        |
| 2-400-tri-st5  | TTTTGACTCAGACCCGACTTGGAAAGGGTTTAGAGTTTT                                                                                                                                                                                                                                                                                                                                                                                                         |
| 2-400-tri-st6  | CCATAGGAGGGAGATGCTTTGGTCCAGACTTCACCATGAGTCCAC<br>CTG                                                                                                                                                                                                                                                                                                                                                                                            |
| 2-400-tri-st7  | TTTTAGACAAGGGACAACAGACAACAGAAAATTGCTCACAGAAG<br>GA                                                                                                                                                                                                                                                                                                                                                                                              |
| 2-400-tri-st8  | TTTTGAAATTAGACACGTTAGGCTGGGGTGCAAATGTCTGAAATC<br>CG                                                                                                                                                                                                                                                                                                                                                                                             |
| 2-400-tri-st9  | GGGTATAGGGGTTTCGCAGTAAGAAAGGGTTTG                                                                                                                                                                                                                                                                                                                                                                                                               |
| 2-400-tri-st10 | TATTCTTTTAAACCCCGCAAGGCTTGGGCGCTATAGAAAGTCCAA<br>GAG                                                                                                                                                                                                                                                                                                                                                                                            |
| 2-400-tri-st11 | TTTTGCGCCCTAATATCTTTTATTAATGATAGGATCTTTT                                                                                                                                                                                                                                                                                                                                                                                                        |
| 2-400-tri-st12 | TTTTTTCAGGTTTTGGGCACCGGGCACAAAATGTCTTTTT                                                                                                                                                                                                                                                                                                                                                                                                        |
| 2-400-tri-st13 | GAGCTAGGTCTAGTACTGAATATCCAAAATAC                                                                                                                                                                                                                                                                                                                                                                                                                |
| 2-400-tri-st14 | AGCTCGCAAATAAGCGGGTTTCATGGGAGCA                                                                                                                                                                                                                                                                                                                                                                                                                 |
| 2-400-tri-st15 | CTGGGAAGAAATGTGGACCGCGTAATACTCCCGCCTTTTTT                                                                                                                                                                                                                                                                                                                                                                                                       |
| 2-400-tri-st16 | TTTTGGGACGACAGGTATAGAAAATGGGTACATGTTTTT                                                                                                                                                                                                                                                                                                                                                                                                         |
| 2-400-tri-st17 | TTTTTGTATGAAACGAGCAAAGATATAATGCGTATGTTTT                                                                                                                                                                                                                                                                                                                                                                                                        |
| 2-400-tri-st18 | AGCTTGGTACATACATGACCTGCTGTCAGAAGACCGGTTTT                                                                                                                                                                                                                                                                                                                                                                                                       |
| 2-400-tri-st19 | TTTCGACATCCCAAGAGCAATCAATATTCCATCTGGTCTTACAGG                                                                                                                                                                                                                                                                                                                                                                                                   |

|                |                                                      |
|----------------|------------------------------------------------------|
|                | GAA                                                  |
| 2-400-tri-st20 | GCAGGAAGCAAGCAAGTGTGTTGTTTTTACAAA                    |
| 2-400-tri-st21 | CAAAGGAAACATGGTCTTGTTACAAAGTATATGTGTATGAAGAATA<br>TG |
| 2-400-tri-st22 | TTTTGTAGACTGTATTATAGACCTGCGTGGA                      |
| 2-400-tri-st23 | TTTTACTTAAACACTGGAAAGTCGTAGCAATTGAAAGCATC            |
| 2-400-tri-st24 | GTAGACCTGAAACAAAACGACAGAGAATTTT                      |

Table S5. Sequences of MUD-square with multiple-unit DNA strands in length of five 400 nt (8 units) and one 328 nt (6 units).

|       |                                                                                                                                                                                                                                                                                                                                                                                                                                                        |
|-------|--------------------------------------------------------------------------------------------------------------------------------------------------------------------------------------------------------------------------------------------------------------------------------------------------------------------------------------------------------------------------------------------------------------------------------------------------------|
| Sma-1 | AAGTCTTAAGTACCCCTCCCCTTATATAGAGTCTATGTCTTATTAC<br>AGACGCTCTTATTACCCTCGTAGGCGATCCTACGGTAGGCGCAG<br>ATATTACAGACGTAGGAGATACTAAACATGGCCTATCAGACTGGA<br>TTGTACGCTTTACCTATTGCAGGACGTTTTCAATTACGAATATGACC<br>GCATGAAGGACTACGGTAAGATGGCAAAGACTACAGACGTAATA<br>CTGGCCGTACCTCTAAGTATGCAACCCAGGGATATGAAGCTCAGA<br>TGTACCGGCAAGCTGGTCAATTATATGATTCTGCTCTTTCGTTTGG<br>TACGTCTGTTGCTGGACGTGTTGGAAGATCAACCAAGGATGTGAC<br>GAAACTATGGATGCAATGAAGAGAGGGCTCTGCTGTGT       |
| Sma-2 | GCTGCTGCTGTGTGGAGCAGTCTTCGTTTCGGCCAGCAGAGTGC<br>AGCCACCGAGAGCATCGTGCGGTTCCCAACATCACCAATCTG<br>TGCCCTTTCGGCGAGGTGTTCAACGCCACCAGATTCGCCTCTGT<br>GTACGCCTGGAACCGGAAGCGGATCAGCAATTGCGTGGCCGACT<br>ACAGCGTGCTGTACAACAGCGCCAGCTTCAGCACCTTCAAGTGCT<br>ACGGCGTGTCCCCTACCAAGCTGAACGACCTGTGCTTACCAAC<br>GTGTACGCCGACAGCTTCGTGATCAGAGGCGACGAAGTGCGGCA<br>GATTGCCCTGGACAGACAGGCAAGATCGCCGATTACAACACTACAA<br>GCTGCCCGACGACTTCACCGGCTGTGTGATTGCCTGGAACAGCA<br>AC     |
| Sma-3 | AACCTGGACAGCAAAGTCGGCGGCAACTACAACACTACCTGTACCG<br>GCTGTTCCGGAAGTCCAACCTGAAGCCTTTCGAGCGGGACATCA<br>GCACCGAGATCTATCAGGCCGGCAGCACCCCTTGCAATGGCGTG<br>GAAGGCTTCAACTGCTACTTCCCACTGCAGTCTACGGCTTCCAG<br>CCTACAAACGGCGTGGGCTACCAGCCTTACAGAGTGGTGGTGCT<br>GAGCTTCGAGCTGCTGCATGCTCCTGCCACAGTGTGCGGCCCTA<br>AGAAAAGCACCAACCTGGTCAAGAACAATGCGTGAACCTTCGGCT<br>ATATCCCCGAGGCTCCTAGAGATGGCCAGGCCTATGTTCCGGAAG<br>GATGGCGAATGGGTGCTGCTGAGCACCTTCCTTTAAATGGCATAT<br>G |
| Sma-4 | TGTATCTGAATGGTCGTCGTCTTCTACCAGGTGGACTCATGGTTT<br>ATGAGGATGAAGTCTGGACCAAAGAAGATGAAGAGGAATACTCTA<br>ACCCTGACAACCATCTCCCTCCTATGGAAGTCGGGTCTGAGTCCC<br>TCTAAACCCCTTCCCAAACCCCTTCTACTTTTTCTGTTGTCTGTTG<br>TCCCTTGTCTGATCCTATCATTCTTCTGTGAGCGAAGCGAACCC<br>CTATACCCGCACCCAGCCTAACGTGTCTAATTTTCAGACATTTTGT<br>CGGATTTTCAGACATTTTGTCCCATGAAACCCGGGGTTTAAAAGA<br>ATATAATAAAAGATATTAGGGCGCAAGGCGGGAGTATTACGCGGT<br>AGCGCCAAGCCTTGCGCTTATTTTCGCGAGCTGTACT         |
| Sma-5 | AGACCTAGCTCGCCCGGTGCCAAAACCTGAACCGGTCTTCTGA<br>CAGCAGGTGCTATTTTGGATATTCATTTGTA AAAACAACACTCTT<br>GGACTTTCTATCCACATTTCTTCCAGCTATACCTGTGCTCCACACA                                                                                                                                                                                                                                                                                                        |

|               |                                                                                                                                                                                                                                                                                                                                       |
|---------------|---------------------------------------------------------------------------------------------------------------------------------------------------------------------------------------------------------------------------------------------------------------------------------------------------------------------------------------|
|               | TGTACCCATTTTTGATGCTTTCAATTGCTGACCATGTTTCCTTTGCTTTGCTTGCCTTCTGCTCTTGGGATGTGCGAAAATGTATGTACCAAGCTTTGCTCGTTTCATACACATACGCATTATATCTTTCCCTGTAAGACCAGATGGAATATTGATTGCCATATTCTTCATACACATATACTTTGTAACAAACGACTTTCCAGTGTTTCCACGCAGGTCTATAATACAGCTACTTCTCTGTCGTTTTGTTTCAGGTCTACTAAGT                                                             |
| Sma-6         | GCTGTTGCCAGGGTCTTAACTGAGCATTTCGGATAGCGTCTGGTACTTTGATCCATGAACATATGAAGTCACCTTCTTTCAGAACATAGTCAAAATTTCTAACACTAGTAGGGCTACAATGACCACTATGCCCCCATATTTCCCGCATTGTTTCCCAGCTTGTAGGATTGCGTAATACAACCTCTGACTTGAAATGTTTCGTATCCGTCTTCTCCTCGTTCTTCCGTAAGCATATCTTTCTCCATTTTCATCTAACCCTTCTTAGTATTTCTTCAGGACATTTTGCCTTAGAAACGGTTATATCGTACCATTTAGGCTCTGTCAT |
| 2328-rec-st1  | CACGCCGTTTGTAGGCTGGAAGCCGTAGGACT                                                                                                                                                                                                                                                                                                      |
| 2328-rec-st2  | CTCAGCACCACCCTCTGTAAGGCTGGTAGCCCTCGGTGCTGATGTCC                                                                                                                                                                                                                                                                                       |
| 2328-rec-st3  | ACACTGTGGCAGGAGCATGCAGCAGCTCGAAGGGTTGGACTTCCGGAA                                                                                                                                                                                                                                                                                      |
| 2328-rec-st4  | TTTTAGTTCACGCATTTGTTCTTGACCAGGTTGGTGCTTTTCTTAGGGCCGC                                                                                                                                                                                                                                                                                  |
| 2328-rec-st5  | TTTTGTTGAAGCCTTCCACGGCAGTGGGAAGTAGCATTTT                                                                                                                                                                                                                                                                                              |
| 2328-rec-st6  | CCATTGCAAGGGGTGCGTAGTTGTAATCGGCG                                                                                                                                                                                                                                                                                                      |
| 2328-rec-st7  | CAGCCGGTACAGGTAGTCCGAACATAGGCCTG                                                                                                                                                                                                                                                                                                      |
| 2328-rec-st8  | ATCACACAGCCGGTGAAGTCGTCCGGGCAGCTTTGCCGGCCTGATAGAT                                                                                                                                                                                                                                                                                     |
| 2328-rec-st9  | CTTTGCTGTCCAGGTTGTTGCTGTTCCAGGCACGCTCGAAAGGCTTCA                                                                                                                                                                                                                                                                                      |
| 2328-rec-st10 | ACCCATTGCGCCATCCTTTGTAGTTGCCGCCGA                                                                                                                                                                                                                                                                                                     |
| 2328-rec-st11 | GAAGGTGCTCAGCAGCGCCATCTCTAGGAGCCTCGGGGATATAGCCGATTTT                                                                                                                                                                                                                                                                                  |
| 2328-rec-st12 | TTTTCATATGCCATTTAAAGCGACCATTCAGATACATTTT                                                                                                                                                                                                                                                                                              |
| 2328-rec-st13 | TTTTCAGGGGCAATCTGCCGATCTTGCCTGTCTGTCTTTT                                                                                                                                                                                                                                                                                              |
| 2328-rec-st14 | CACTTCGTGCTCCTCTGGCACAGGTCGTTTCAGC                                                                                                                                                                                                                                                                                                    |
| 2328-rec-st15 | ATCACGAAGCTGTCCGGGAGGGAGATGGTTGT                                                                                                                                                                                                                                                                                                      |
| 2328-rec-st16 | CTCTTCATCTTCTTTGGAAAGGGTTTGGGAAA                                                                                                                                                                                                                                                                                                      |
| 2328-rec-st17 | CATAAACCATGAGTCCAGACAAGGGACAACAG                                                                                                                                                                                                                                                                                                      |
| 2328-rec-st18 | AGACCCGACTTCCATACGTACACGTTGGTGAA                                                                                                                                                                                                                                                                                                      |
| 2328-rec-st19 | GGGTTTAGAGGGACTCCAGGGTTAGAGTATTC                                                                                                                                                                                                                                                                                                      |
| 2328-rec-st20 | ACAACAGAAAAAGTAAGTCCAGACTTCATCCT                                                                                                                                                                                                                                                                                                      |
| 2328-rec-st21 | AAGGAATGATAGGATCACCTGGTAGAAGACGA                                                                                                                                                                                                                                                                                                      |
| 2328-rec-st22 | TTTTTTTCGCTTCGCTCACAGGGTGCGGGTATAGGGGTTTT                                                                                                                                                                                                                                                                                             |
| 2328-rec-st23 | TTTTCGTAGCACTTGAAGGTTTGGTAGGGGACACGCTTTT                                                                                                                                                                                                                                                                                              |

|               |                                                          |
|---------------|----------------------------------------------------------|
| 2328-rec-st24 | GCTGAAGCTGGCGCTGCCGAAACGAAGACTGCTCCACACAGCAG<br>CAGCTTTT |
| 2328-rec-st25 | TTGTACAGCACGCTGTAGTCGGCCACGCAATTCACGATGCTCTCG<br>GTG     |
| 2328-rec-st26 | GCTGATCCGCTTCCGGTTCAGGCGTACACAG                          |
| 2328-rec-st27 | AGGCGAATCTGGTGGCCAAAATGTCTGAAATT                         |
| 2328-rec-st28 | AAAGGGCACAGATTGGTGATGTTGGGGAACCG                         |
| 2328-rec-st29 | AATGTCTGAAATCCGAGTTGAACACCTCGCCG                         |
| 2328-rec-st30 | GGTTTCATGGGAGCAAAGACACGTTAGGCTGG                         |
| 2328-rec-st31 | TTTTATTCTTTTAAACCCCGTAATATCTTTTATTATTTTT                 |
| 2328-rec-st32 | TTTTACACAGCAGAGCCCTCATCCAAAATACGACCT                     |
| 2328-rec-st33 | TTCAGGTTTTGGGCACAAGAAATGTGGATAGA                         |
| 2328-rec-st34 | CGGGCGAGCTAGGTCTAGTACAGCTCGCGAAA                         |
| 2328-rec-st35 | GCGCTACCGCGTAATAGAAACATGGTCAGCAA                         |
| 2328-rec-st36 | GTTTTTACAAATGAATTCTTCATTGCATCCATTTTT                     |
| 2328-rec-st37 | AAGTCCAAGAGTGTTTGCTGTCAGAAGACCGGGGCTGCACTCTG<br>CTGG     |
| 2328-rec-st38 | TGGGTACATGTGGGACGACAGGTATAGCTGGG                         |
| 2328-rec-st39 | TTGAAAGCATCAAAAATAAGCGCAAGGCTTGG                         |
| 2328-rec-st40 | TTTTACATCCCAAGAGCAGGAAGCAAGCAAGCAAAGCTCCCGCCT<br>TGCGCCC |
| 2328-rec-st41 | TTTTAGTTTCGTCACATCCTTGTTGATCTTCCAACGTATCTCCTA<br>CGTCTG  |
| 2328-rec-st42 | GTACCAAACGAAAGAGAGCGTACAATCCAGTC                         |
| 2328-rec-st43 | CAGAATCATATAATTGACCAGCTTGCCGGTAC                         |
| 2328-rec-st44 | CCTGGGTTGCATACTTTTGCCATCTTACCGTA                         |
| 2328-rec-st45 | AGAGGTACGGCCAGTAGGTACATACATTTTCGTTTT                     |
| 2328-rec-st46 | TGATAGGCCATGTTTAAACGTCCAGCAACAGAC                        |
| 2328-rec-st47 | TATTCGTAAATGAAACGTCCTGCAATAGGTAA                         |
| 2328-rec-st48 | GTCCTTCATGCGGTCAATCTGAGCTTCATATC                         |
| 2328-rec-st49 | TTTTGAAACGAGCAAAGCTTTTACGTCTGTAGTCTT                     |
| 2328-rec-st50 | TTTTCGTAGGATCGCCTACGTAATATCTGCGCCTACTTTT                 |
| 2328-rec-st51 | AGGGTAATAAGAGCGTGGGGTACTTAAGACTTATGACAGAGCCTA<br>AATTTTT |
| 2328-rec-st52 | CTGTAATAAGACATAGACCTGCGTGAAACAC                          |
| 2328-rec-st53 | ACAAAGTATATGTGTATGAAGAATATGGCAAT                         |
| 2328-rec-st54 | CAATATTCCATCTGGTCCGAAATGCTCAGTTA                         |
| 2328-rec-st55 | GTAGACTGTATTATAGACTCTATATAAGGGGA                         |
| 2328-rec-st56 | ACAAAACGACAGAGAATGGAAAGTCGTTTGTT                         |
| 2328-rec-st57 | AAGTACCAGACGCTATCTTACAGGGAAAGATATAATGCGTATGTG<br>TATTTTT |
| 2328-rec-st58 | TTTTATATGTTTCATGGATCAGAAAGAAGGTGACTTCTTTT                |
| 2328-rec-st59 | TTTTGGTACGATATAACCGTTTCTAAGGCAAAAATGT                    |



|               |                                                      |
|---------------|------------------------------------------------------|
| 2328-rec-st60 | CCTGAAGAAATACTAAGGAAGTGGTTAGATGA                     |
| 2328-rec-st61 | AAATGGAGAAAGATATGGGAAATATGGGGGCA                     |
| 2328-rec-st62 | TAGTGGTCATTGTAGCAGACCCTGGCAACAGCACTTAGTAGACCT<br>GAA |
| 2328-rec-st63 | CCTACTAGTGTTAGAAATTTTACTATGTTCT                      |

Table S6. Sequences of MUD-cross with multiple-unit DNA strands in length of two 300 nt (6 units), one 360 nt (7 units) and one 410 nt (8 units).

|                     |                                                                                                                                                                                                                                                                                                                                                                                                                                                             |
|---------------------|-------------------------------------------------------------------------------------------------------------------------------------------------------------------------------------------------------------------------------------------------------------------------------------------------------------------------------------------------------------------------------------------------------------------------------------------------------------|
| Gfc-2 (300)         | GCTCAACTTTACATGGAGAAAACACCTTCTCCCGTTTATGACAAG<br>GTTTCGGGGGATCTTACTATACTGAGCCCCGAACAAACCATC<br>GACTCTAGCATCACCAAATTGCCACTACAACATCTGCTTATAGAAC<br>TGGGAAGGGTAGGGCTAGGATATGCATAGGCAATATTAGACCTGT<br>AACGCTCCTCGCAAGCCATAAGGCTGCGAATGGCCCAAGAGGTC<br>CAATGCCCGCTTGCACGATTTCCGAGGAACGAGCGACGTCAGCT<br>GTCCGGCTTCGAGATTGAACCCTGACGGGTTG                                                                                                                          |
| ACTB-GFP-L<br>(410) | CCTCGGCTCACAGCGCGCCCGGCTATTCTCGCAACTGACAATGG<br>TGAGCAAGGGCGAGGAGCTGTTACCGGGGTGGTGCCCATCCT<br>GGTCGAGCTGGACGGCGACGTAAACGGCCACAAGTTCAGCGTGT<br>CCGGCGAGGGCGAGGGCGATGCCACCTACGGCAAGCTGACCCT<br>GAAGTTCATCTGCACCACCGGCAAGCTGCCCGTGCCCTGGCCCA<br>CCCTCGTGACCACCCTGACCTACGGCGTGCAAGTTCAGCCGC<br>TACCCCGACCACATGAAGCAGCACGACTTCTTCAAGTCCGCCATG<br>CCCGAAGGCTACGTCCAGGAGCGCACCATCTTCTTCAAGGACGA<br>CGGCAACTACAAGACCCGCGCCGAGGTGAAGTTCGAGGGCGAC<br>ACCCTGGTGAACCGCA |
| Gfc-4 (300)         | GCGGTACCTACGCCCTAGAGCTTTTGGACTTGTATTTAGTACGGT<br>GTGTACTAGTGGCGGGCCGCCTGCCGGGACCCGGATTCAAGTGC<br>GTCCTGGTAAGAAGCTACTGTGCCTTTCTCCTTAGCGCTGAAGA<br>TAATCGGTCTTAATTCCTCATATAACCTCCAGTTAAATCAAGTGT<br>CTCGATAGCTCGTTCTGGATGAGGTAGTGTGGTTTATTGAATAG<br>GTGTGAAGAAAATATTTGTTAATTAGGTGATATAAAGTAGAGTTAA<br>ATAAAGTGTATGGATAGGTGGTTGTGTATG                                                                                                                          |
| CAR-2 (360)         | CAGGGTAATACGCTTCCGTACACGTTCCGGAGGGGGGACCAAGCT<br>GGAGATCACAGGTGGCGGTGGCTCGGGCGGTGGTGGGTCCGGT<br>GGCGGCGGATCTGAGGTGAAACTGCAGGAGTCAGGACCTGGCC<br>TGGTGGCGCCCTCACAGAGCCTGTCCGTCACATGCACTGTCTCA<br>GGGTCTCATTACCCGACTATGGTGTAAGCTGGATTGCCAGCCT<br>CCACGAAAGGGTCTGGAGTGGCTGGGAGTAATATGGGGTAGTGA<br>AACCACATACTATAATTCAGCTCTCAAATCCAGACTGACCATCATC<br>AAGGACAACCTCCAAGAGCCAAGTTTTCTTAAAAATGAACAGTCTG<br>CAAAC                                                     |
| cross-st1           | GATTTAACGCACAGTAGCTACTAACCAATCTTACCAGGACCTAAT<br>TA                                                                                                                                                                                                                                                                                                                                                                                                         |
| cross-st2           | TTTTACGAGCTATCGAGACACTT                                                                                                                                                                                                                                                                                                                                                                                                                                     |
| cross-st3           | TTTTGATTATCTTACCCGGCAGGCGTTTT                                                                                                                                                                                                                                                                                                                                                                                                                               |
| cross-st4           | GCGCTAAGGAAGAAAGTGGAGGTTATATGAGGGAATTAAGACCTT<br>TT                                                                                                                                                                                                                                                                                                                                                                                                         |
| cross-st5           | TTTTCTATTCAATAACCTCATCCAGATTTT                                                                                                                                                                                                                                                                                                                                                                                                                              |
| cross-st6           | TTTTGCCCGCCACTATACTAAATACATTTT                                                                                                                                                                                                                                                                                                                                                                                                                              |

|            |                                                      |
|------------|------------------------------------------------------|
| cross-st7  | ACAAATATACCTATCCATACACTTCCTCCGAACGTGTACG             |
| cross-st8  | TATTTAACTCTCACCGGTACAACCTTATATCACGCACTGAATCCGG<br>GT |
| cross-st9  | TTTTCATACACAACCTTTCTTCACACTTTT                       |
| cross-st10 | TTTTAGTCCAAAAGCAGGTACCGCTGCGGTTGTCCTTGAAGAAGA<br>TG  |
| cross-st11 | TGTGATCTCCAGGCGTTCTAGGCTTGGTCCCC                     |
| cross-st12 | CCGAGCCACCGCCACCAGCCTTCGGGCATGGCAAGTCGTGCTGC<br>TTCA |
| cross-st13 | CCCGACCCACCACCGCGAAGCGTATTAC                         |
| cross-st14 | TTTTTGCAGTTTCACCTCAGATCCGCCGCCAGGCGCCACCAGGC<br>CAG  |
| cross-st15 | TTTTCTCGGCGCGGGTCACGAGGGTGTTTT                       |
| cross-st16 | TCTTGTAGTTGCCGTCCACCAGGGTGTCGCCCTCGAACTTCACTT<br>TT  |
| cross-st17 | GCTGAAGCACTGCACGGTGCAGATGAAGTGGTAGTATCTTCAGG<br>GTCA |
| cross-st18 | TGTGGTCGGGGTAGCGGTGCGCTCCTGGACGT                     |
| cross-st19 | CCCCTGAGACAGTGCCTGGCGAATCCAGCTT                      |
| cross-st20 | TTTTGGGTAATGAGAGTCCTGACTCCTTTT                       |
| cross-st21 | TTTTGGCCAGGGCACATCGCCCTCGCTTTT                       |
| cross-st22 | GGGCAGCTTGCCGGTGCCGTAGGTCAGGGTGG                     |
| cross-st23 | ACTCCCAGCCACTCCAGATGGTCAGTCTGGAT                     |
| cross-st24 | GACCCTTTCGTGGAGGTGTGACGGACATGAAGGGACTGGCTCTG<br>TGAG |
| cross-st25 | AAGAAAACCTTGCTCTGTGTTTTCTCCATGTAAAGTTGAGCTTTTT       |
| cross-st26 | GCAGACTGTTCATTTTTACACCATAGTCTTTT                     |
| cross-st27 | TTTTCTCGCCGGACACGCTGAACTTGTGGCGCTTGCCGTAGGT<br>GGC   |
| cross-st28 | CGTTTACGTCGCCGTCCATTGTCAGTTTTTTT                     |
| cross-st29 | CAGCTCGACCAGGATGTTGAGAGCTGAATTATTTCACTACCCCAT<br>ATT |
| cross-st30 | GGCACCACCCCTTGCCGAAGGTGAACAGCTCGAGGCAACCCC<br>GGGG   |
| cross-st31 | TTTTGTCAAGATCCCTCATAAACGGGAGAAGTGGAGTTGTCCTTG<br>AT  |
| cross-st32 | TTTTGCGAGAATAGCGCTGACGTCGCTTTT                       |
| cross-st33 | GCCGGACACGGGCGCGCTGTGAGCCCTCGCCCTTGCTCAC             |
| cross-st34 | TTGTTGTCAGGGTTCATGTTGTAGTGGCAATT                     |
| cross-st35 | TTTTGAGTCGATGGTGCTCACGTATATTTT                       |
| cross-st36 | TTTTTCGTTCTCGGAGCGGGCATTGTTTT                        |
| cross-st37 | CCAGTTGTGCAAAATCCTATAAGCAGAATCTCGAA                  |
| cross-st38 | CATATCCTAGCCCTACGGCTTGCGAGGAGCGTTACAGGTCTAATT        |

|            |                                      |
|------------|--------------------------------------|
|            | TT                                   |
| cross-st39 | TTTTTATTGCCTATGTGGTGATGCTATTTT       |
| cross-st40 | TTTTGACCTCTTGGGCCATTCGCAGCCTTATCCTTC |

Table S7. Sequences of the MUD-1U, a portion of which is displayed and marked in italics in Table S2.

|                               |                                                |
|-------------------------------|------------------------------------------------|
| a13.1-b13.1-a12.2*            | CCCGAAGTACCTCTGCAGGATGCGTCGCCAG                |
| a13.2-b13.2-a12.3*-<br>b12.2* | CGTTACCAGGCTACGATGAGTGTAGACCAAGACACGGTCAG<br>A |
| a13.3-b13.3-a12.4*-<br>b12.3* | CTGTCCCCTCTCCTTCAAATGTGGCGCGGATCTATAACA        |
| a13.4-b13.4-a12.5*-<br>b12.4* | CATTATATTGCTCCTGAGGGTGTAATCTGGACTCCTAATGA      |
| a13.5-T10-T10-b12.5*          | CGTGCATGCCCTTTTTTTTTTTTTTTTTTTTACTGGGTACAA     |
| T4-a12.2-b12.2                | TTTTCTGGCGACGCTCTGACCGTGT                      |
| a12.3-b12.3                   | CTTGGTCTACTGTTTATAGAT                          |
| a12.4-b12.4                   | CGCGCGCCACTCATTAGGAGT                          |
| a12.5-b12.5                   | CCAGATTTACTTGTACCCAGT                          |
| a15.5-T10-T10-b14.5*          | CCAAACCGTCCTTTTTTTTTTTTTTTTTTTTAAATAGCCGCA     |
| a17.5-T10-T10-b16.5*          | CACTTAGAGTCTTTTTTTTTTTTTTTTTTTTACGAGCGGAA      |
| a19.5-T10-T10-b18.5*          | CTGACATTACCTTTTTTTTTTTTTTTTTTTTACGATCGGTCA     |
| a21.5-T10-T10-b20.5*          | CTTTGGCCATCTTTTTTTTTTTTTTTTTTTTAAAGCACTTACA    |
| a23.5-T10-T10-b22.5*          | CGTGAATGCACTTTTTTTTTTTTTTTTTTTTAACTATCGGCA     |
| a24.2-T11-a23.2*-<br>b23.1*   | CTGTATCGGCTTTTTTTTTTTTTTATAGTCTTGAAGTTAGCAA    |
| a23.3*-b23.2*                 | GGATGCGCGTGAGCGTCCTGA                          |
| a23.4*-b23.3*                 | GCAGCTTTACGAATAACGGA                           |
| a23.5*-b23.4*                 | GTGCATTACGATAGACCATA                           |

Table S8. Sequences of MUD-2U. The short DNA strands are marked by italic.

|                     |                                                                                                                              |
|---------------------|------------------------------------------------------------------------------------------------------------------------------|
| Gfc-100-1 (112 nt)  | AGTGTAGGTAGGGGGTATAGGTTTTGAGTTGTATTTATTAAGTG<br>TGTAGAAGTTGATGGAATAGTGGGGTAAAGTTATTGTGTTAGTG<br>ATGTTATGAGATGGTTATCAG        |
| Gfc-100-2 (94 nt)   | AGTTTCATGTCGCCAACGGAATACTTACCACAGGAGGGAGCACAT<br>ACACTGAGGCGCGCCGTCCGCCTCTGTTCAAAGGACATTGGTCA<br>TCCTA                       |
| Gfc-100-3 (108 nt)  | TCCATGAAACGTATGGGGTCGAAATAAAAAGACAGTATATCTAAT<br>GATGTTAGGTATCGTACAGATGAGTGATACCGCGTTACGACCAGA<br>ATTTGCTGGCTCTCAGGT         |
| Gfc-100-4 (94 nt)   | GCTCAACTTTACATGGAGAAAACACCTTCTCCCGTTTATGACAAG<br>GTTCCGGGGATCTTGACTATACGTGAGCCCCGAACAAACCATC<br>GACTC                        |
| Gfc-100-5 (116 nt)  | TAGCATCACCAAATTGCCACTACAACATCTGCTTATAGAACTGGG<br>AAGGGTAGGGCTAGGATATGCATAGGCAATATTAGACCTGTAACG<br>CTCCTCGCAAGCCATAAGGCTGCGAA |
| Gfc-100-6 (90 nt)   | ATGGCCCAAGAGGTCCAATGCCCGCTTGCACGATTTCCGAGGAA<br>CGAGCGACGTCAGCTGTCCGGCTTCGAGATTGAACCCTGACGGG<br>TT                           |
| Gfc-100-7(112 nt)   | TGGGCGTAGATCATTGCTAACTAACTCGGACGCAGGGGCACC<br>CAGGCCAGCGTGACAGCAAGTAGTCGTCTACCCATTTTCGTG<br>TTTGAGAGACTGCAACCGGTTTTT         |
| Gfc-100-8 (90 nt)   | AAGCAGTCCCCTTGGGTGGAAGCGGAGTAATAGTTGGCAGCAA<br>AATGTAGCCGATCCGCATGCGCACTTCACTCCGTGGTGACCGTA<br>AA                            |
| Gfc-100-9 (112 nt)  | GTTCCACGGCGAGTCTGATCGCGATGCTATGTGAATCCCACCGA<br>CACGTTGCGGCATTAACAGCCTAAGTCAATTACTCACACAATCTC<br>TTTGTTGATTATTCTATTGTAC      |
| Gfc-100-10 (90 nt)  | GCGGTACCTACGCCCTAGAGCTTTTGGACTTGTATTTAGTACGGT<br>GTGTACTAGTGGCGGGCCGCTGCCGGGACCCGGATTCAAGTGC<br>GT                           |
| Gfc-100-11 (112 nt) | CCTGGTAAGAAGCTACTGTGCCTTTCTTCTTAGCGCTGAAGATA<br>ATCGGTCTTAATCCCTCATATAACCTCCAGTTAAATCAAGTGTCT<br>CGATAGCTCGTTCTGGATGAG       |
| Gfc-100-12 (98 nt)  | GTAGTGTTGGTTTATTGAATAGGTGTGAAGAAAATATTTGTTAATT<br>AGGTGATATAAAGTAGAGTTAAATAAAGTGTATGGATAGGTGGTT<br>GTGTATG                   |
| Gfc-6-12-St_1       | <i>TTTTCATACACAACCACCTATTAAGACC</i>                                                                                          |
| Gfc-6-12-St_2       | <i>AACTCTACTTTATATCCACTTGATTTAACTGGGGCGGCCC</i>                                                                              |
| Gfc-6-12-St_3       | <i>ACACCTATAACACTACCTCATCCATACAAGTC</i>                                                                                      |
| Gfc-6-12-St_4       | <i>GATTATCTTTACCAGGACGCACTGTGCCGCAA</i>                                                                                      |
| Gfc-6-12-St_5       | <i>TATCGAGAACCTAATTAACAAATATTTTCTTC</i>                                                                                      |
| Gfc-6-12-St_6       | <i>TTTTAAACCTCAATTTTT</i>                                                                                                    |

|                |                                            |
|----------------|--------------------------------------------|
| Gfc-6-12-St_7  | TTTTAAGGCACAGTAGCTTCTCAGCGCTAAGGAAGATTTT   |
| Gfc-6-12-St_8  | TCCCGGCAAGGTTATATGAGGGAATCCATACACTTTATTT   |
| Gfc-6-12-St_9  | GCCACTAGAGATTGTGTGAGTAATGCGCATGC           |
| Gfc-6-12-St_10 | CAAAAGCTGGTACCGCGTGACAATCTATTACT           |
| Gfc-6-12-St_11 | CGTGTCGGCGTGGAACTTTACGGTCACGCTGG           |
| Gfc-6-12-St_12 | CAACAAAGTACACACCGTACTAAAGAACGAGC           |
| Gfc-6-12-St_13 | TTTTGCGTACTAGGTTTT                         |
| Gfc-6-12-St_14 | TTTTTCGCGATCAGACTCGCTGGGATTCACATAGCATTTT   |
| Gfc-6-12-St_15 | AGTGAAGTTGACTTAGGCTGTAAAATCCGGG            |
| Gfc-6-12-St_16 | GGATCGGCCACGAAAATGGGGTAGGCCGACACA          |
| Gfc-6-12-St_17 | CCGCTTTCGACTGCTTAAAAACCGATCGTGCA           |
| Gfc-6-12-St_18 | CCTGGGTGTACGCCCAAACCCGTCCTAGCCC            |
| Gfc-6-12-St_19 | CTCTCAAATACATTTTGCTGCCAAAGAATAAT           |
| Gfc-6-12-St_20 | TTTTAAGGGCACCCTTTT                         |
| Gfc-6-12-St_21 | TTTTAGTTTAGCGAATGATCCCCCTGCGTCCGAGTTTTTT   |
| Gfc-6-12-St_22 | ATCTCGAAACGACTACTTCGTCTGCACCACGG           |
| Gfc-6-12-St_23 | GCTGACGTAGCGTTACAGGTCTAAGGCTCACG           |
| Gfc-6-12-St_24 | AGCGGGCATGGGCCATTCGCAGCGTCATAAA            |
| Gfc-6-12-St_25 | TACCCTTCTTGGTGATGCTAGAGTCGATGGTT           |
| Gfc-6-12-St_26 | TTGCGAGGCGCTCGTTCCTCGGAAGTTGCAGT           |
| Gfc-6-12-St_27 | TTTTCCTCTTTGGATTTT                         |
| Gfc-6-12-St_28 | TTTTATGTTGTAGTGGCAATCCAGTTCTATAAGCAGTTTTT  |
| Gfc-6-12-St_29 | TGTTCCGGGTATTGCCTATGCATATAGGGTTCA          |
| Gfc-6-12-St_30 | TATAGTCAATTCTGGTCGTAACGCGAACAGAG           |
| Gfc-6-12-St_31 | CGGGAGAACCATGTAAAGTTGAGCACCTGAGA           |
| Gfc-6-12-St_32 | CCTAACATCAACGTTTCATGGATAGGATGACC           |
| Gfc-6-12-St_33 | GCCAGCAAAGATCCCCCGAACCTTCTTATGGC           |
| Gfc-6-12-St_34 | TTTTTTTTCTGGTGTTTTT                        |
| Gfc-6-12-St_35 | TTTTTTTTATTTTCGACCCCATTTAGATATACTGTCTTTTTT |
| Gfc-6-12-St_36 | AATGTCCTTTGGTATCACTCATCTGTACGATA           |
| Gfc-6-12-St_37 | GCCGACGGAACATCACTAACACAATAACTTTA           |
| Gfc-6-12-St_38 | CTGTGGTTTGGCGACATGAAACTCTGATAAC            |
| Gfc-6-12-St_39 | CCCCCACTATTCCATCAACTTCTAACCCCTACCTA        |
| Gfc-6-12-St_40 | CATCTCATCGCGCCTCAGTGTATGTGCTCCCTC          |
| Gfc-6-12-St_41 | TTTTTCCGAAGTATTTT                          |
| Gfc-6-12-St_42 | TTTTCAACTCAAAAACCTATCACACTTTAATAAATATTTT   |

Table S9. Sequences of MUD-3U.

|                 |                                                                                                                                                                         |
|-----------------|-------------------------------------------------------------------------------------------------------------------------------------------------------------------------|
| Gfc-1-1(162 nt) | GCTCAACTTTACATGGAGAAAACACCTTCTCCCGTTTATGACAAG<br>GTTCCGGGGGATCTTGACTATACGTGAGCCCCGAACAAACCATC<br>GACTCTAGCATCACCAAATTGCCACTACAACATCTGCTTATAGAA<br>CTGGGAAGGGTA          |
| Gfc-1-2(152 nt) | GCTCAACTTTACATGGAGAAAACACCTTCTCCCGTTTATGACAAG<br>GTTCCGGGGGATCTTGACTATACGTGAGCCCCGAACAAACCATC<br>GACTCTAGCATCACCAAATTGCCACTACAACATCTGCTTATAGAA<br>CTGGGAAGGGTA          |
| Gfc-2-1(146 nt) | GGGCTAGGATATGCATAGGCAATATTAGACCTGTAACGCTCCTC<br>GCAAGCCATAAGGCTGCGAATGGCCCAAGAGGTCCAATGCCCG<br>CTTGACGATTTCCGAGGAACGAGCGACGTCAGCTGTCCGGCTT<br>CGAGATTGAACCCTG           |
| Gfc-2-2(154 nt) | GGGCTAGGATATGCATAGGCAATATTAGACCTGTAACGCTCCTC<br>GCAAGCCATAAGGCTGCGAATGGCCCAAGAGGTCCAATGCCCG<br>CTTGACGATTTCCGAGGAACGAGCGACGTCAGCTGTCCGGCTT<br>CGAGATTGAACCCTGACGGGTTG   |
| Gfc-3-1(154 nt) | TGGGCGTAGATCATTTCGCTAAACTAACTCGGACGCAGGGGCACC<br>CAGGCCAGCGTGCAGACGAAGTAGTCGTCTACCCCATTTTCGTG<br>TTTGAGAGACTGCAACCGGTTTTTAAGCAGTCCCCTTGGGTGGAA<br>AGCGGAGTAATAGTTGGCAGC |
| Gfc-3-2(160 nt) | TGGGCGTAGATCATTTCGCTAAACTAACTCGGACGCAGGGGCACC<br>CAGGCCAGCGTGCAGACGAAGTAGTCGTCTACCCCATTTTCGTG<br>TTTGAGAGACTGCAACCGGTTTTTAAGCAGTCCCCTTGGGTGGAA<br>AGCGGAGTAATAGTTGGCAGC |
| Gfc-4-1(154 nt) | AAAATGTAGCCGATCCGCATGCGCACTTCACTCCGTGGTGACCG<br>TAAAGTTCCACGGCGAGTCTGATCGCGATGCTATGTGAATCCCA<br>CCGACACGTTGCGGCATTAACAGCCTAAGTCAATTACTCACACAA<br>TCTCTTTGTTGATTATTCTAT  |
| Gfc-4-2(146 nt) | CCGCATGCGCACTTCACTCCGTGGTGACCGTAAAGTTCCACGGC<br>GAGTCTGATCGCGATGCTATGTGAATCCCACCGACACGTTGCGG<br>CATTAACAGCCTAAGTCAATTACTCACACAATCTCTTTGTTGATTA<br>TTCTATTGTCAC          |
| 1228-St1        | TTTTCATACACAACCACCTATTAAGACC                                                                                                                                            |
| 1228-St2        | AACTCTACTTTATATCCACTTGATTTAACTGGGGCGGCCC                                                                                                                                |
| 1228-St3        | ACACCTATAAACTACCTCATCCATACAAGTC                                                                                                                                         |
| 1228-St4        | GATTATCTTTACCAGGACGCACTGTGCCGCAA                                                                                                                                        |
| 1228-St5        | TATCGAGAACCTAATTAACAAATATTTTCTTC                                                                                                                                        |
| 1228-St6        | TTTTAAACCTCAATTTTT                                                                                                                                                      |
| 1228-St7        | TTTTAAGGCACAGTAGCTTCTCAGCGCTAAGGAAGATTTT                                                                                                                                |
| 1228-St8        | TCCCGGCAAGGTTATATGAGGGGAATCCATACACTTTATTT                                                                                                                               |
| 1228-St9        | GCCACTAGAGATTGTGTGAGTAATGCGCATGC                                                                                                                                        |
| 1228-St10       | CAAAAGCTGGTACCGCGTGACAATCTATTACT                                                                                                                                        |



|           |                                                    |
|-----------|----------------------------------------------------|
| 1228-St11 | CGTGTCGGCGTGGAACCTTTACGGTCACGCTGG                  |
| 1228-St12 | CAACAAAGTACACACCGTACTAAAGAACGAGC                   |
| 1228-St13 | TTTTGCGTACTAGGTTTT                                 |
| 1228-St14 | TTTTTCGCGATCAGACTCGCTGGGATTCACATAGCATTTT           |
| 1228-St15 | AGTGAAGTTGACTTAGGCTGTAAAATCCGGG                    |
| 1228-St16 | GGATCGGCCACGAAAATGGGGTAGAGCCGGAC                   |
| 1228-St17 | CCGCTTTCGACTGCTTAAAAACCGAATCGTGC                   |
| 1228-St18 | CCTGGGTGTACGCCACAACCCGTCTAGCCCTACCCTTCTTGG<br>TGAT |
| 1228-St19 | CTCTCAAATACATTTTGCTGCCAAAGAATAAT                   |
| 1228-St20 | TTTTAAGGGCACCCTTTT                                 |
| 1228-St21 | TTTTAGTTTAGCGAATGATCCCCCTGCGTCCGAGTTTTTT           |
| 1228-St22 | AATCTCGAACGACTACTTCGTCTGCACCACGG                   |
| 1228-St23 | AGCTGACGAGCGTTACAGGTCTAAGGCTCACG                   |
| 1228-St24 | AAGCGGGCTTGGGCCATTTCGACGCGTCATAAA                  |
| 1228-St25 | TTGCGAGGTCGCTCGTTCCTCGGAGTTGCAGT                   |
| 1228-St26 | TTTTACCTCATTGGTTTT                                 |
| 1228-St27 | TTTTATGTTGTAGTGCCAATCCAGTTCTATAAGCAGTTTT           |
| 1228-St28 | GCTAGAGTACGATACCTAACATCAACGTTTCA                   |
| 1228-St29 | TGTTCCGGTATTGCCTATGCATATCAGGGTTC                   |
| 1228-St30 | TATAGTCAATTCTGGTCGTAACGCGAACAGAG                   |
| 1228-St31 | CGGGAGAACCATGTAAAGTTGAGCACCTGAGA                   |
| 1228-St32 | GCCAGCAAAGATCCCCCGAACCTTCTTATGGC                   |
| 1228-St33 | TTTTTTTCTGGTGTTTTT                                 |
| 1228-St34 | TTTTTTTATTTTCGACCCCATTTAGATATACTGTCTTTTTT          |
| 1228-St35 | TGGATAGGATTCCATCAACTTCTAACCCCCTACCTA               |
| 1228-St36 | TGTCCTTTGGTATCACTCATCTGTGCGATGGTT                  |
| 1228-St37 | GCCGACGGAACATCACTAACACAA                           |
| 1228-St38 | CTGTGGTTTGGCGACATGAAACTCTGATAAC                    |
| 1228-St39 | TAACCTTACCCCCACTATGACCAA                           |
| 1228-St40 | CATCTCATCGCGCCTCAGTGTATGTGCTCCCTC                  |
| 1228-St41 | TTTTTTCCGAAGTATTTT                                 |
| 1228-St42 | TTTTCAACTCAAAAACCTATCACACTTAAATAAATATTTT           |

Table S10. Sequences of MUD-4U. The short DNA strands are same with MUD-2U, marked by italic in Table S8.

|                    |                                                                                                                                                                                                                                   |
|--------------------|-----------------------------------------------------------------------------------------------------------------------------------------------------------------------------------------------------------------------------------|
| Gfc-200-1 (206 nt) | AGTGTAGGTAGGGGGTATAGGTTTTTGTAGTTGTATTTATTAAGT<br>GTGTAGAAGTTGATGGAATAGTGGGGTAAAGTTATTGTGTTAGT<br>GATGTTATGAGATGGTTATCAGAGTTTCATGTCGCCAACGGAATA<br>CTTACCACAGGAGGGAGCACATACTGAGGCGCGCCGTCCGGC<br>CTCTGTTCAAAGGACATTGGTCATCCTA      |
| Gfc-200-2 (202 nt) | TCCATGAAACGTATGGGGTCGAAATAAAAAGACAGTATATCTAAT<br>GATGTTAGGTATCGTACAGATGAGTGATACCGCCTTACGACCAG<br>AATTTGCTGGCTCTCAGGTGCTCAACTTTACATGGAGAAAACACC<br>TTCTCCCGTTTATGACAAGGTTCCGGGGATCTTGACTATACGTGA<br>GCCCCCGAACAAACCATCGACTC        |
| Gfc-200-3 (206 nt) | TAGCATCACCAAATTGCCACTACAACATCTGCTTATAGAAGTGGG<br>AAGGGTAGGGCTAGGATATGCATAGGCAATATTAGACCTGTAAC<br>GCTCCTCGCAAGCCATAAGGCTGCGAAATGGCCCAAGAGGTCCA<br>ATGCCCGCTTGCACGATTTCCGAGGAACGAGCGACGTCAGCTGT<br>CCGGCTTCGAGATTGAACCCTGACGGTT     |
| Gfc-200-4 (202 nt) | TGGGCGTAGATCATTCCGCTAACTAACTCGGACGCAGGGGCACC<br>CAGGCCAGCGTGCAGACGAAGTAGTCGTCTACCCCATTTTCGTG<br>TTTGAGAGACTGCAACCGGTTTTTAAGCAGTCCCCTTGGGTGGAA<br>AGCGGAGTAATAGTTGGCAGCAAAAATGTAGCCGATCCGCATGCG<br>CACTTCACTCCGTGGTGACCGTAAA       |
| Gfc-200-5 (202 nt) | GTTCCACGGCGAGTCTGATCGCGATGCTATGTGAATCCCACCGA<br>CACGTTGCGGCATTAACAGCCTAAGTCAATTAATCACACAATCTC<br>TTTGTGATTATTCTATTGTCACGCGGTACCTACGCCCTAGAGCT<br>TTTGGACTTGTATTTAGTACGGTGTGTACTAGTGGCGGGCCGCCT<br>GCCGGGACCCGGATTCAAGTGCCT        |
| Gfc-200-6 (210 nt) | CCTGGTAAGAAGCTACTGTGCCTTTCTTCCTTAGCGCTGAAGATA<br>ATCGGTCTTAATCCCTCATATAACCTCCAGTTAAATCAAGTGTCT<br>CGATAGCTCGTTCTGGATGAGGTAGTGTTGGTTTATTGAATAGGT<br>GTGAAGAAAATATTTGTTAATTAGGTGATATAAAGTAGAGTTAAAT<br>AAAGTGTATGGATAGGTGGTTGTGTATG |

Table S11. Sequences of MUD-6U. The short DNA strands are marked by italic.

|                    |                                                                                                                                                                                                                                                                                                                                                  |
|--------------------|--------------------------------------------------------------------------------------------------------------------------------------------------------------------------------------------------------------------------------------------------------------------------------------------------------------------------------------------------|
| Gfree-c-1 (314 nt) | AGTGTAGGTAGGGGGTATAGGTTTTTGAGTTGTATTTATTAAGTG<br>TGTAGAAGTTGATGGAATAGTGGGGTAAAGTTATTGTGTTAGTG<br>ATGTTATGAGATGGTTATCAGAGTTTCATGTCGCCAACGGAATACT<br>TACCACAGGAGGGAGCACATACTGAGGCGCGCCGTCGGCCTC<br>TGTTCAAAGGACATTGGTCATCCTATCCATGAAACGTATGGGGTC<br>GAAATAAAAAGACAGTATATCTAATGATGTTAGGTATCGTACAGAT<br>GAGTGATACCGGTTACGACCAGAATTTGCTGGCTCTCAGGT    |
| Gfree-c-2 (300 nt) | GCTCAACTTTACATGGAGAAAACACCTTCTCCCGTTTATGACAAG<br>GTTCCGGGGATCTTGACTATACGTGAGCCCCGAACAAACCATC<br>GACTCTAGCATCACCAAATTGCCACTACAACATCTGCTTATAGAAC<br>TGGGAAGGGTAGGGCTAGGATATGCATAGGCAATATTAGACCTGT<br>AACGCTCCTCGCAAGCCATAAGGCTGCGAATGGCCCAAGAGGTC<br>CAATGCCCGCTTGACGATTTCCGAGGAACGAGCGACGTCAGCT<br>GTCCGGCTTCGAGATTGAACCCTGACGGGTTG               |
| Gfree-c-3 (314 nt) | TGGGCGTAGATCATTTCGCTAAACTAACTCGGACGCAGGGGCACC<br>CAGGCCAGCGTGACAGCAAGTAGTCGTCTACCCCATTTTCGTGT<br>TTGAGAGACTGCAACCGGTTTTTAAGCAGTCCCCTTGGGTGGAAA<br>GCGGAGTAATAGTTGGCAGCAAATGTAGCCGATCCGCATGCGC<br>ACTTCACTCCGTGGTGACCGTAAAGTTCCACGGCGAGTCTGATCG<br>CGATGCTATGTGAATCCCACCGACACGTTGCGGCATTAACAGCCT<br>AAGTCAATTACTCACACAATCTCTTTGTTGATTATTCTATTGTAC |
| Gfree-c-4 (300 nt) | GCGGTACCTACGCCCTAGAGCTTTTGGACTTGTATTTAGTACGGT<br>GTGTACTAGTGGCGGGCCGCTGCCGGGACCCGGATTCAAGTGC<br>GTCCTGGTAAGAAGCTACTGTGCCTTTCTTCCTTAGCGCTGAAGA<br>TAATCGGTCTTAATTCCTCATATAACCTCCAGTTAAATCAAGTGT<br>CTCGATAGCTCGTTCTGGATGAGGTAGTGTGGTTTATTGAATAG<br>GTGTGAAGAAAATATTTGTTAATTAGGTGATATAAAGTAGAGTTAA<br>ATAAAGTGTATGGATAGGTGGTTGTGTATG               |
| Gfree-c-st_1       | CATACACAACCACCTATTAAGACCGATTATCT                                                                                                                                                                                                                                                                                                                 |
| Gfree-c-st_2       | AACTCTACTTTATATCCACTTGATTTAACTGG                                                                                                                                                                                                                                                                                                                 |
| Gfree-c-st_3       | GAACGAGCTATCGAGAACCTAATTAACAAATATTTTCTTCACACCT<br>AT                                                                                                                                                                                                                                                                                             |
| Gfree-c-st_4       | AACACTACCTCATCCATACAAGTCCAAAAGCT                                                                                                                                                                                                                                                                                                                 |
| Gfree-c-st_5       | TTTTAAACCTCAATTTTT                                                                                                                                                                                                                                                                                                                               |
| Gfree-c-st_6       | TTTTAAGGCACAGTAGCTTCTCAGCGCTAAGGAAGATTTT                                                                                                                                                                                                                                                                                                         |
| Gfree-c-st_7       | TTACCAGGACGCACTGTGCCGCAACGTGTCGGCGTGGAACTTTA<br>CGGT                                                                                                                                                                                                                                                                                             |
| Gfree-c-st_8       | AATCCGGGTCCCGGCAAGGTTATATGAGGGAATCCATACACTTTA<br>TTT                                                                                                                                                                                                                                                                                             |
| Gfree-c-st_9       | GGCGGCCCGCCACTAGAGATTGTGTGAGTAAT                                                                                                                                                                                                                                                                                                                 |
| Gfree-c-st_10      | GGTACCGCGTGACAATCTATTACTCCGCTTTC                                                                                                                                                                                                                                                                                                                 |
| Gfree-c-st_11      | TTTTGCGTACTAGGTTTT                                                                                                                                                                                                                                                                                                                               |

|               |                                                       |
|---------------|-------------------------------------------------------|
| Gfree-c-st_12 | TTTTTCGCGATCAGACTCGCTGGGATTCACATAGCATTTT              |
| Gfree-c-st_13 | GCGCATGCGGATCGGCCACGAAAATGGGGTAG                      |
| Gfree-c-st_14 | TACATTTTGTGCCAAAGAATAATCAACAAAGTACACACCGTACTA<br>AA   |
| Gfree-c-st_15 | CACGCTGGCCTGGGTGTACGCCACAACCCGTCCTAGCCCTACC<br>CTTC   |
| Gfree-c-st_16 | ACGACTACTTCGTCTGCACCACGGAGTGAAGTTGACTTAGGCTGT<br>TAA  |
| Gfree-c-st_17 | GACTGCTTAAAAACCGAATCGTGCAAGCGGGC                      |
| Gfree-c-st_18 | TTTTAAGGGCACCCTTTT                                    |
| Gfree-c-st_19 | TTTTAGTTTAGCGAATGATCCCCCTGCGTCCGAGTTTTTT              |
| Gfree-c-st_20 | AGCCGGACAGCTGACGAGCGTTACAGGTCTAAGGCTCACGTATA<br>GTCA  |
| Gfree-c-st_21 | TCGCTCGTTCCTCGGAGTTGCAGTCTCTCAA                       |
| Gfree-c-st_22 | TTGGGCCATTTCGACGCGTCATAAACGGGAGAACCATGTAAAGTTG<br>AGC |
| Gfree-c-st_23 | TTTTACCTCATTGGTTTT                                    |
| Gfree-c-st_24 | TTTTATGTTGTAGTGGCAATCCAGTTCTATAAGCAGTTTT              |
| Gfree-c-st_25 | TTGGTGATGCTAGAGTACGATACCTAACATCA                      |
| Gfree-c-st_26 | CGATGGTTTGTTCGGGTATTGCCTATGCATATCAGGGTTCAATCT<br>CGA  |
| Gfree-c-st_27 | AGATCCCCCGAACCTTCTTATGGCTTGCGAGG                      |
| Gfree-c-st_28 | TTTTTTTCTGGTGTTTT                                     |
| Gfree-c-st_29 | TTTTTTTATTTTCGACCCCATTTAGATATACTGTCTTTTTT             |
| Gfree-c-st_30 | ACGTTTCATGGATAGGATTCCATCAACTTCTAACCCCTACCTACA<br>CT   |
| Gfree-c-st_31 | GAACAGAGGCCGACGGAACATCACTAACACAA                      |
| Gfree-c-st_32 | CGCGCCTCAGTGTATGACCTGAGAGCCAGCAAATTCTGGTCGTAA<br>CGC  |
| Gfree-c-st_33 | TGCTCCCTCCTGTGGTTTGGCGACATGAAACTCTGATAACCATCT<br>CAT  |
| Gfree-c-st_34 | TAACTTTACCCCACTATGACCAATGTCCTTTGGTATCACTCATCT<br>GT   |
| Gfree-c-st_35 | TTTTTTCCGAAGTATTTT                                    |
| Gfree-c-st_36 | TTTTCAACTCAAAAACCTATCACACTTTAATAAATATTTT              |

Table S12. Sequences of MUD-12U. The short DNA strands are same with MUD-6U, marked by italic in Table S11.

|                |                                                                                                                                                                                                                                                                                                                                                                                                                                                                                                                                                                                                                                                                                                                          |
|----------------|--------------------------------------------------------------------------------------------------------------------------------------------------------------------------------------------------------------------------------------------------------------------------------------------------------------------------------------------------------------------------------------------------------------------------------------------------------------------------------------------------------------------------------------------------------------------------------------------------------------------------------------------------------------------------------------------------------------------------|
| Gfc-L (614 nt) | <p>AGTGTAGGTAGGGGGTATAGGTTTTTGAGTTGTATTTATTAAGTG<br/> TGTAAGAAGTTGATGGAATAGTGGGGGTAAAGTTATTGTGTTAGTG<br/> ATGTTATGAGATGGTTATCAGAGTTTCATGTCGCCAACGGAATACT<br/> TACCACAGGAGGGAGCACATACTGAGGCGCGCCGTCGGCCTC<br/> TGTTCAAAGGACATTGGTCATCCTATCCATGAAACGTATGGGGTC<br/> GAAATAAAAAGACAGTATATCTAATGATGTTAGGTATCGTACAGAT<br/> GAGTGATAACCGGTTACGACCAGAATTTGCTGGCTCTCAGGTGCT<br/> CAACTTTACATGGAGAAAACACCTTCTCCCGTTTTATGACAAGGTTG<br/> GGGGGATCTTGACTATACGTGAGCCCCGAACAAACCATCGACT<br/> CTAGCATCACCAAATTGCCACTACAACATCTGCTTATAGAACTGG<br/> GAAGGGTAGGGCTAGGATATGCATAGGCAATATTAGACCTGTAAC<br/> GCTCCTCGCAAGCCATAAGGCTGCGAATGGCCCAAGAGGTCCAA<br/> TGCCCGCTTGACGATTTCCGAGGAACGAGCGACGTCAGCTGTC<br/> CGGCTTCGAGATTGAACCCTGACGGGTTG</p> |
| Gfc-R (614 nt) | <p>TGGGCGTAGATCATTGCTAAACTAACTCGGACGCAGGGGCACC<br/> CAGGCCAGCGTGACAGACGAAGTAGTCGTCTACCCCATTTTCGTGT<br/> TTGAGAGACTGCAACCGGTTTTTAAGCAGTCCCCTTGGGTGGAAA<br/> GCGGAGTAATAGTTGGCAGCAAATGTAGCCGATCCGCATGCGC<br/> ACTTCACTCCGTGGTGACCGTAAAGTTCCACGGCGAGTCTGATCG<br/> CGATGCTATGTGAATCCCACCGACACGTTGCGGCATTAACAGCCT<br/> AAGTCAATTAACACACAATCTCTTTGTTGATTATTCTATTGTCACG<br/> CGGTACCTACGCCCTAGAGCTTTTGGACTTGTATTTAGTACGGTG<br/> TGTAAGTAGTGGCGGGCCGCTGCCGGGACCCGGATTAGTGCCT<br/> CCTGGTAAGAAGCTACTGTGCCTTTCTTCCTTAGCGCTGAAGATA<br/> ATCGGTCTTAATCCCTCATATAACCTCCAGTTAAATCAAGTGTCT<br/> CGATAGCTCGTTCTGGATGAGGTAGTGTGGTTTATTGAATAGGT<br/> GTGAAGAAAATATTTGTTAATTAGGTGATATAAAGTAGAGTTAAAT<br/> AAAGTGTATGGATAGGTGGTTGTGTATG</p>   |

Table S13. Sequences of MUD-24U. The short DNA strands are same with MUD-6U, marked by italic in Table S11.

|               |                                                                                                                                                                                                                                                                                                                                                                                                                                                                                                                                                                                                                                                                                                                                                                                                                                                                                                                                                                                                                                                                                                                                                                                                                                                                                                                                                                              |
|---------------|------------------------------------------------------------------------------------------------------------------------------------------------------------------------------------------------------------------------------------------------------------------------------------------------------------------------------------------------------------------------------------------------------------------------------------------------------------------------------------------------------------------------------------------------------------------------------------------------------------------------------------------------------------------------------------------------------------------------------------------------------------------------------------------------------------------------------------------------------------------------------------------------------------------------------------------------------------------------------------------------------------------------------------------------------------------------------------------------------------------------------------------------------------------------------------------------------------------------------------------------------------------------------------------------------------------------------------------------------------------------------|
| Gfc (1228 nt) | AGTGTAGGTAGGGGGTATAGGTTTTGAGTTGTATTTATTAAGTG<br>TGTAGAAGTTGATGGAATAGTGGGGTAAAGTTATTGTGTTAGTG<br>ATGTTATGAGATGGTTATCAGAGTTTCATGTCGCCAACGGAATACT<br>TACCACAGGAGGGAGCACATACTGAGGCGCGCCGTCGGCCTC<br>TGTTCAAAGGACATTGGTCATCCTATCCATGAAACGTATGGGGTC<br>GAAATAAAAAGACAGTATATCTAATGATGTTAGGTATCGTACAGAT<br>GAGTGATAACCGGTTACGACCAGAATTTGCTGGCTCTCAGGTGCT<br>CAACTTTACATGGAGAAAACACCTTCTCCCGTTTTATGACAAGGTTG<br>GGGGGATCTTGACTATACGTGAGCCCCGAACAAACCATCGACT<br>CTAGCATCACCAAATTGCCACTACAACATCTGCTTATAGAACTGG<br>GAAGGGTAGGGCTAGGATATGCATAGGCAATATTAGACCTGTAAC<br>GCTCCTCGCAAGCCATAAGGCTGCGAATGGCCCAAGAGGTCCAA<br>TGCCCGCTTGACGATTTCCGAGGAACGAGCGACGTCAGCTGTC<br>CGGCTTCGAGATTGAACCCTGACGGGTTGTGGGCGTAGATCATT<br>CGCTAAACTAACTCGGACGCAGGGGCACCCAGGCCAGCGTGCA<br>GACGAAGTAGTCGTCTACCCATTTTCGTGTTTGAGAGACTGCAA<br>CCGGTTTTTAAGCAGTCCCCTTGGGTGGAAGCGGAGTAATAGTT<br>GGCAGCAAATGTAGCCGATCCGCATGCGCACTTCACTCCGTGG<br>TGACCGTAAAGTTCCACGGCGAGTCTGATCGCGATGCTATGTGAA<br>TCCCACCGACACGTTGCGGCATTAACAGCCTAAGTCAATTACTCA<br>CACAATCTCTTTGTTGATTATTCTATTGTCACGCGGTACCTACGCC<br>CTAGAGCTTTTGGACTTGTATTTAGTACGGTGTGTAAGTGGCG<br>GGCCGCCTGCCGGGACCCGGATTCAAGTGCCTCGTAAAGAAAG<br>CTACTGTGCCTTTCTTCTTAGCGCTGAAGATAATCGGTCTTAATT<br>CCCTCATATAACCTCCAGTTAAATCAAGTGTCTCGATAGCTCGTTC<br>TGGATGAGGTAGTGTTGGTTTATTGAATAGGTGTGAAGAAAATATT<br>TGTTAATTAGGTGATATAAAGTAGAGTTAAATAAAGTGTATGGATA<br>GGTGGTTGTGTATG |
|---------------|------------------------------------------------------------------------------------------------------------------------------------------------------------------------------------------------------------------------------------------------------------------------------------------------------------------------------------------------------------------------------------------------------------------------------------------------------------------------------------------------------------------------------------------------------------------------------------------------------------------------------------------------------------------------------------------------------------------------------------------------------------------------------------------------------------------------------------------------------------------------------------------------------------------------------------------------------------------------------------------------------------------------------------------------------------------------------------------------------------------------------------------------------------------------------------------------------------------------------------------------------------------------------------------------------------------------------------------------------------------------------|
